1 **The *Parastagonospora nodorum* necrotrophic effector SnTox5 targets the wheat gene *Snn5***  
2 **and facilitates entry into the leaf mesophyll**

3 Gayan K. Kariyawasam<sup>1</sup>, Jonathan K. Richards<sup>2</sup>, Nathan A. Wyatt<sup>3</sup>, Katherine Running<sup>4</sup>, Steven  
4 S. Xu<sup>3</sup>; Zhaohui Liu<sup>1</sup>, Pawel Borowicz<sup>5</sup>, Justin D. Faris<sup>3</sup> and Timothy L. Friesen<sup>1,3</sup>

5 <sup>1</sup>Department of Plant Pathology, North Dakota State University, Fargo, ND, USA

6 <sup>2</sup>Department of Plant Pathology and Crop Physiology, Louisiana State University – Agricultural  
7 Center, Baton Rouge, LA, USA

8 <sup>3</sup>Cereal Crops Research Unit, United States Department of Agriculture-Agricultural Research  
9 Service, Edward T. Schafer Agricultural Research Center, Fargo, ND, USA

10 <sup>4</sup>Department of Plant Science, North Dakota State University, Fargo, ND, USA

11 <sup>5</sup>Department of Animal Sciences, North Dakota State University, Fargo, ND, USA

12

13 Corresponding author: Timothy L. Friesen

14 Email: [timothy.friesen@usda.gov](mailto:timothy.friesen@usda.gov)

15 **Abstract**

16 *Parastagonospora nodorum*, causal agent of septoria nodorum blotch, is a destructive  
17 necrotrophic fungal pathogen of wheat. *P. nodorum* is known to secrete several necrotrophic  
18 effectors that target wheat susceptibility genes that trigger classical biotrophic resistance  
19 responses but resulting in susceptibility rather than resistance. SnTox5 targets the wheat  
20 susceptibility gene *Snn5* to induce necrosis. In this study, we used full genome sequences of 197  
21 *P. nodorum* isolates collected from the US and their disease phenotyping on the *Snn5* differential  
22 line LP29, to perform genome wide association study analysis to localize the *SnTox5* gene to  
23 chromosome 8 of *P. nodorum*. *SnTox5* was validated using gene transformation and CRISPR-  
24 Cas9 based gene disruption. *SnTox5* encoded a small secreted protein with a 22 and 45 amino  
25 acid secretion signal and a pro sequence, respectively. The *SnTox5* gene is under purifying  
26 selection in the Upper Midwest but under strong diversifying selection in the South/East regions  
27 of the US. Comparison of wild type and SnTox5-disrupted strains on wheat lines with and  
28 without the susceptibility target *Snn5* showed that SnTox5 has two functions, 1) facilitating  
29 colonization of the mesophyll layer, and 2) targeting *Snn5* to induce programmed cell death to  
30 provide cellular nutrient to complete its necrotrophic life cycle.

## 31 **Introduction**

32 Plant pathogenic fungi secrete a variety of effectors that contribute to virulence during host  
33 infection. These effectors are secreted into the apoplast or internalized into the cytoplasm where  
34 they manipulate the host cell's biological processes to promote host colonization (Lo Presti et al.  
35 2015; Franceschetti et al. 2017). However, plants have evolved plant innate immunity including  
36 resistance (R) receptors that recognize effectors, resulting in effector triggered immunity (ETI)  
37 and pattern recognition receptors (PRRs) that recognize pathogen associated molecular patterns  
38 (PAMPs), resulting in PAMP-triggered immunity (PTI) (Jones and Dangle, 2006). Typically the  
39 resistance response results in programmed cell death (PCD) surrounding the infection site via an  
40 intense but localized reaction called a hypersensitive response (HR) that occurs along with, or as  
41 a result of a combination of physiological processes including, accumulation of reactive oxygen  
42 species (ROS), lipid peroxidation, ion fluxes, and deposition of callose on infection sites (Dodds  
43 and Rathjen, 2010; Balint-Kurti, 2019).

44 Localized PCD is highly effective against biotrophic fungal pathogens because this class of  
45 pathogens typically requires a living cell to extract nutrients. The PCD response is less effective  
46 against necrotrophic fungal pathogens because they thrive and acquire nutrients made available  
47 by cell death. Necrotrophic fungal pathogens release necrotrophic effectors (NEs), a group of  
48 effectors that target host genes to trigger necrosis, providing nutrients to the pathogen (Friesen  
49 and Faris, 2010; Faris and Friesen 2020). Unlike classical gene-for-gene interactions described  
50 for biotrophic pathosystems (Flor, 1971), necrotrophic interactions result in necrotrophic effector  
51 triggered susceptibility (NETS) (Liu et al. 2009). In the past two decades several NE- host  
52 susceptibility gene interactions have been described, including those found in the *Pyrenophora*  
53 *tritici-repentis*-wheat (Faris et al. 2013), *Pyrenophora teres*-barley (Liu et al. 2015), *Bipolaris*

54 *sorokiniana*-wheat (McDonald et al. 2018), *C. victoriae*-oat, *C. victoriae*-*Arabidopsis* (Lorang et  
55 al. 2007), *Periconia circinata*-sorghum (Nagy and Bennetzen, 2008) and *Parastagonospora*  
56 *nodorum*-wheat pathosystems (Faris and Friesen 2020).

57 Four susceptibility genes targeted by necrotrophic effectors have been cloned. These include  
58 *Tsn1* (Faris et al. 2010), a wheat gene that confers sensitivity to SnToxA (Friesen et al. 2006),  
59 Ptr ToxA (Ciuffetti et al. 1997), and BsToxA (McDonald et al. 2018), the sorghum gene *Pc* that  
60 confers sensitivity to Pc-toxin (Nagy and Bennetzen, 2008), the *Arabidopsis* gene *Lov1* that  
61 confers sensitivity to victorin (Lorang et al. 2007), the wheat genes *Snn1* that confers sensitivity  
62 to SnTox1 (Shi et al. 2016), and *Snn3-D1* that confers sensitivity to SnTox3 (Zhang et al. 2021).  
63 Although *Snn3-D1* has not been functionally shown to be involved in a resistance-like response,  
64 each of the other characterized susceptibility genes resemble genes involved in resistance  
65 responses to biotrophic pathogens, where *Tsn1*, *Pc*, and *Lov1* encode proteins with nucleotide  
66 binding (NB) and leucine rich repeat domains (LRR), and *Snn1* encodes a wall associated kinase  
67 (WAK) (Shi et al. 2016). These examples show that necrotrophic pathogens often hijack the  
68 plant's resistance response system by targeting the defense response pathways to induce PCD,  
69 facilitating the completion of its pathogenic life cycle.

70 *P. nodorum* is a destructive necrotrophic fungal pathogen of wheat that causes the economically  
71 important disease septoria nodorum blotch (SNB). Extensive research over the last two decades  
72 has shown that *P. nodorum* deploys several proteinaceous necrotrophic effectors during the  
73 infection process. To date, nine such interactions have been identified including, SnToxA-*Tsn1*  
74 (Friesen et al. 2006), SnTox1-*Snn1* (Liu et al. 2004), SnTox267-*Snn2* (Friesen et al. 2007;  
75 Richards et al. 2021), SnTox267-*Snn6* (Gao et al. 2015), SnTox3-*Snn3-B1* (Friesen et al. 2008),  
76 SnTox3-*Snn3-D1* (Zhang et al. 2011; Zhang et al. 2021), SnTox4-*Snn4* (Abeysekara et al. 2009),

77 SnTox5-*Snn5* (Friesen et al. 2012), and SnTox267-*Snn7* (Shi et al. 2015). Therefore, currently  
78 the wheat-*P. nodorum* system is recognized as a model for the study of the infection process of  
79 necrotrophic specialist pathogens (Oliver et al. 2012; Faris and Friesen 2020).

80 Currently three necrotrophic effector genes from the *P. nodorum* system have been cloned and  
81 functionally characterized, including *SnToxA*, *SnTox1*, and *SnTox3*. *SnToxA* is nearly identical to  
82 the *ToxA* gene found in *P. tritici-repentis* and *Bipolaris sorokiniana* and it encodes a 13.2 kDa  
83 mature protein that targets *Tsn1* indirectly to cause necrosis (Ciuffetti et al. 1997; Friesen et al.  
84 2006; McDonald et al. 2018). *SnTox3* was the second *P. nodorum* necrotrophic effector gene  
85 cloned (Liu et al. 2009), encoding for a mature 17.5 kDa protein that targets *Snn3-B1* (Friesen et  
86 al. 2008) and *Snn3-D1* (Zhang et al. 2011; Zhang et al. 2021) to induce necrosis. SnTox3 also  
87 functions to suppress the host defense through an direct interaction with TaPR1 proteins (Breen  
88 et al. 2016; Sung et al. 2021). The most recent necrotrophic effector gene that was cloned in this  
89 system was *SnTox1* that encoded a 10.3 kDa protein that targets Snn1 directly (Shi et al. 2016) to  
90 trigger an oxidative burst, upregulation of PR-genes, and DNA laddering (Liu et al. 2012). Liu et  
91 al. (2016), showed that in addition to targeting Snn1, SnTox1 had the ability to bind chitin and  
92 protect the fungal cell wall from wheat chitinases.

93 SnTox5 is also a proteinaceous necrotrophic effector and interacts with the susceptibility gene  
94 *Snn5* (Friesen et al. 2012). *Snn5* was mapped to chromosome 4B in the Lebsock×PI94749  
95 (LP749) population using culture filtrates of *P. nodorum* isolate Sn2000 that contained the  
96 SnTox5 protein (Friesen et al. 2012). Susceptibility to Sn2000 also mapped to the *Snn5* locus on  
97 4B showing that *P. nodorum* was using the necrotrophic effector SnTox5 as a virulence factor to  
98 target the *Snn5* susceptibility gene to induce PCD resulting in disease.

99 Here we used whole genome sequencing of 197 *P. nodorum* isolates in a genome wide  
100 association study (GWAS) to identify, clone, and functionally validate the *SnTox5* gene from *P.*  
101 *nodorum* isolate Sn2000. We also used laser confocal microscopy to characterize the role that  
102 *SnTox5* plays in *P. nodorum* leaf colonization. This study provides further characterization of  
103 how *P. nodorum* is using its arsenal of necrotrophic effectors to target the host defense pathways  
104 to complete its pathogenic life cycle.

## 105 **Materials and methods**

### 106 *Disease phenotyping*

107 A set of 197 *P. nodorum* isolates was collected from geographically diverse winter, spring, and  
108 durum wheat growing regions of the US. The population consisted of 51 isolates collected from  
109 spring wheat in North Dakota and Minnesota, 45 isolates collected from durum wheat in North  
110 Dakota, nine isolates collected from winter wheat in South Dakota, and 92 isolates from winter  
111 wheat regions of the United States representing Arkansas, Georgia, Maryland, New York, North  
112 Carolina, Ohio, Oklahoma, Oregon, South Carolina, Tennessee, Texas, and Virginia, (Richards  
113 et al. 2019). Culture preparation and phenotyping was done as described by Friesen and Faris,  
114 (2012). In brief, a dried agar plug of each isolate was place on V8-PDA (150 ml of V8 juice, 10  
115 g of Difco potato dextrose agar, 3g of CaCO<sub>3</sub>, 10g of Agar in 1000 ml of water) and allowed to  
116 rehydrate for 15 minutes. The rehydrated plug was then streaked across the plate to evenly  
117 distribute the spores and the plate was incubated at room temperature under continuous light for  
118 seven days or until pycnidia emerged. Plates with pycnidia were flooded with sterile-distilled  
119 water and agitated with a sterile inoculation loop to stimulate the release of pycnidiospores.  
120 Spores were harvested, and the spore concentration was adjusted to  $1 \times 10^6$  spores/mL and two  
121 drops of Tween20 were added per 100 ml of spore suspension.

122 All isolates were phenotyped for disease reaction on LP29, the differential line for *Snn5*, which  
123 is the sensitivity gene targeted by SnTox5 (Friesen et al 2012). LP29 is a progeny line chosen  
124 from the doubled haploid population derived from the cross Lebsock × PI94749 that segregated  
125 for the wheat susceptibility genes *Snn5* and *Tsn1* (Friesen et al 2012). Each replicate consisted of  
126 a single cone with three plants of LP29. Borders were planted with the wheat cultivar Alsen to  
127 reduce any edge effect. Plants were grown for approximately fourteen days. Plants at the two-to-  
128 three leaf stage were inoculated with a spore suspension using a pressurized paint sprayer.  
129 Leaves were inoculated until runoff and kept in a lighted mist chamber at 100% relative  
130 humidity at ~21 °C for 24 hours prior to being moved into a climate-controlled growth chamber  
131 at 21 °C with a 12-hour photoperiod for six additional days. At 7 days post-inoculation, disease  
132 was evaluated using a 0-5 rating scale based on the lesion type as described in Liu et al. (2004).  
133 Each experiment was performed in three replications and the average of the three replicates was  
134 used in downstream analysis.

### 135 ***Whole genome sequencing and variant identification***

136 Raw sequencing reads for each isolate were generated using the Illumina HiSeq 4000 platform at  
137 BGI Americas Corp and uploaded to the NCBI short read archive under BioProject  
138 PRJNA398070 (Richards et al. 2019). Raw sequencing reads were trimmed using Trimmomatic  
139 v0.36 (Bolger et al. 2014) and were mapped to the reference genome sequence of *P. nodorum*  
140 isolate Sn2000 using BWA-MEM (Li, 2013). SAMtools ‘mpileup’ (Li et al.2009) was used to  
141 identify SNPs/InDels and the variants were filtered based on the genotype quality where only the  
142 polymorphisms with genotype quality equal to or greater than 40 with the support of a minimum  
143 of three reads were used for downstream analysis. All heterozygote calls were marked as missing  
144 data and variants with 30% or more missing data were removed from the dataset. In addition,

145 markers with a minor allele frequency of less than 5% were filtered out from the final dataset  
146 used for genome-wide association study analysis.

### 147 ***Genome-wide association study (GWAS) analysis***

148 Mapping for GWAS was performed using GAPIT (Lipka et al. 2012; Tang et al. 2016) and  
149 TASSEL v5 (Bradbury et al. 2007). For the association mapping conducted using TASSEL v5, a  
150 naïve model and a model comprised of the first three components of PCA as fixed effects were  
151 used. For the analysis performed with GAPIT, models with a kinship matrix (K) using EMMA as  
152 a random effect and models using a combination of both PCA and K were used. The most robust  
153 model was selected based on Q-Q plot results. A Bonferroni correction was used to adjust the *P*-  
154 value in the R statistical environment and the markers were considered significant when an  
155 adjusted *P*-value was equal to or less than 0.05.

### 156 ***Identification of candidate genes***

157 The candidate region for *SnTox5* in the Sn2000 genome was identified using GWAS analysis.  
158 The region was screened for genes encoding small secreted proteins using SignalP v4.1 (Petersen  
159 et al. 2011) and EffectorP v1.0 (Sperschneider et al. 2016). A gene encoding a small secreted  
160 protein that contained the marker with the most significant marker-trait association from GWAS  
161 analysis was considered the top candidate for *SnTox5*.

### 162 ***Deletion of SnTox5 in the virulent isolate Sn2000***

163 The disruption of *SnTox5* was carried out using a CRISPR-Cas9 ribonucleoprotein-mediated  
164 technique as described in Foster et al. (2018). In brief, FASTA sequence of *SnTox5* in Sn2000  
165 was input into E-CRISP at <http://www.e-crisp.org/E-CRISP/> to select the primer template for the  
166 sgRNA. Oligonucleotides were purchased from Eurofins Genomics, KY. The sgRNA was



167 synthesized using the sgRNA synthesis kit NEB#E3322 from New England Biolabs following  
168 the manufacturer's protocol. The resulting sgRNA was purified prior to complexing with Cas9-  
169 NLS via the RNA clean and concentrator - 25 kit from Zymo Research following the  
170 manufacturer's instructions.

171 Primers, Tox5HygDonor F1 and Tox5HygDonor R1 (Supplementary Table 1) were designed to  
172 amplify the complete hygromycin resistance gene as the donor DNA. Each primer consisted of a  
173 40 bp sequence homologous to the flanking region adjacent to the protospacer adjacent motif  
174 (PAM) site and 3 bp upstream of the PAM site that is incorporated into the ends of the  
175 hygromycin resistance gene, *cpc-1:hyg<sup>R</sup>*, which was amplified from the pDAN vector (Liu et al.  
176 2012) as the template.

177 Fungal protoplast generation and transformation were performed as described in Liu and Friesen  
178 (2012). Cas9-NLS were complexed with sgRNAs and then mixed with the donor DNA that was  
179 transformed into protoplasts of Sn2000. Protoplasts were plated on regeneration medium agar  
180 supplemented with hygromycin B. Regenerated colonies were picked and screened for *SnTox5*  
181 disruption using the primers SnTox5\_pENTR\_F1\_bac and SnTox5\_pENTR\_R1 (Supplementary  
182 Table 1) and for the presence of the hygromycin resistance gene. Two *SnTox5*-disrupted strains  
183 and one strain with an ectopic insertion of the hygromycin resistance gene were used for  
184 downstream phenotypic analysis on the host.

### 185 ***QTL analysis of the LP749 population using SnTox5 gene disruption strains***

186 The LP749 population (Friesen et al 2012) was used to map the SnTox5-*Snn5* interaction. The  
187 same population was inoculated separately with the two *SnTox5* gene disruption strains  
188 Sn2kΔTox5-10 and Sn2kΔTox5-15, the ectopic strain Sn2k-ect7, and the wild type strain

189 Sn2000. Side by side inoculations using each of the four strains were completed on full LP749  
190 populations and the disease was evaluated at seven days post-inoculation as described above.  
191 Averages disease reactions from three replicates were used to perform composite interval  
192 mapping (CIM) to evaluate the significance of the *SnTox5-Snn5* and *SnToxA-Tsn1* interactions  
193 for the inoculation of each *P. nodorum* strain using Qgene v4.4.0 (Joehanes and Nelson, 2008).  
194 A permutation test that consisted of 1000 iterations yielded a LOD threshold of 3.0 at an  
195 experimental-wise significance level of 0.05 and was used to evaluate the significance of the  
196 resulting QTL.

#### 197 ***Expression of SnTox5 in the avirulent P. nodorum isolate Sn79-1087***

198 The Gateway cloning system (Gong et al. 2015) was used to develop constructs with *SnTox5*.  
199 Approximately 1.7 kb of the genomic region of *SnTox5*, including a 1 kb region upstream of the  
200 gene that included the putative promotor region (Supplementary Figure 1) was amplified with  
201 forward primer SnTox5\_DONOR\_F and reverse primer SnTox5\_DONOR\_R (Supplementary  
202 Table 1). Each primer consisted of a full length attB sequence at the 5' end. The PCR amplicon  
203 with an attB sequence at the end was visualized using gel electrophoresis and purified using the  
204 GeneJet Gel Extraction Kit (Thermo Scientific). Fragments were cloned into the pDONOR  
205 vector via a BP Clonase reaction (Invitrogen). The pDONOR vector, containing the resistance  
206 gene zeocin, was transformed into *E. coli* and transformed colonies were selected on low salt  
207 Luria-Bertani broth (LB) agar medium (10g of tryptone, 5g of NaCl, 5g of yeast extract, and 16g  
208 of agar in 1000 ml of water ) amended with zeocin (50 µg/ml). Five *E. coli* transformants were  
209 picked and inoculated in 2 ml of low salt LB with zeocin and used to extract plasmid using the  
210 Monarch plasmid miniprep kit (New England Bio Labs). Presence of the genomic fragment  
211 containing *SnTox5* was verified by Sanger sequencing using the Tox5\_Seq\_F, M13 forward and

212 reverse primers (Supplementary Table 1). The extracted pDONOR plasmid with the insertion  
213 was used to perform an LR Clonase reaction as instructed by the manufacturer (Invitrogen) to  
214 transfer the genomic region into the destination vector, pFPL-RH, that contained the hygromycin  
215 resistance cassette. The construct was linearized using *PmeI* and concentrated to 1 µg/µl. Fungal  
216 protoplasting and transformation was performed as described in Liu and Friesen (2012) to  
217 transform Sn79-1087 (avirulent isolate) with *SnTox5*. Colonies that developed on regeneration  
218 media with hygromycin (100 µg/ml) were screened for the presence of the gene through PCR  
219 amplification using primers SnTox5\_PENTR\_F and SnTox5\_PENTR\_R (Supplementary Table  
220 1). Two transformants, Sn79+Tox5-3 and Sn79+Tox5-4 and wildtype Sn79-1087 were  
221 inoculated onto the LP749 population and QTL analysis was done as mentioned previously.  
222 Furthermore, culture filtrates of Sn79+Tox5-3 and Sn79-1087 were prepared as described (Liu et  
223 al. 2004) and used to infiltrate the LP749 population. Sensitivity was scored using a 0-3 rating  
224 scale where 0 was rated as insensitive and 3 was rated as highly sensitive (Friesen and Faris  
225 2012). Data was used for QTL analysis as described previously.

### 226 ***Homology between SnTox3 and SnTox5***

227 Protein BLAST was performed against the NCBI non-redundant protein sequence database using  
228 the amino acid sequence of SnTox5 as the query. SnTox3, which was the protein with highest  
229 homology to SnTox5, was aligned to SnTox5 using “Geneious Alignment” option in Geneious  
230 Prime. In addition, disulfide bridges in SnTox5 that formed between cysteine residues were  
231 predicted using the web-based application DiANNA1.1  
232 (<http://clavius.bc.edu/~clotelab/DiANNA/>).

### 233 ***Population genetics and haplotype analysis of SnTox5***

234 BAM files for 197 isolates of the GWAS panel were developed as described above and were  
235 used to extract reads mapped to chromosome 8:53219-53872bp of the Sn2000 genome using  
236 SAMtools (Li et al. 2009) and a BED file, creating FastQ files for each isolate. *De-novo* assembly  
237 of *SnTox5* for each isolate was completed using SPADES v.3.11.1 (Nurk et al. 2013) with  
238 default settings and *SnTox5* sequences for each isolate were developed for use in haplotype  
239 analysis. In addition, coverage of the *SnTox5* gene in each isolate was calculated using the  
240 ‘coverage’ function of BEDTools (Quinlan et al. 2010). Isolates with more than 50% of the  
241 *SnTox5* gene were considered to have the gene, whereas, isolates with coverage less than or  
242 equal to 50% were considered to lack the gene. Genomic sequences of *SnTox5* for isolates that  
243 contained complete coverage of the gene were converted to FASTA format and imported into  
244 DNASP v6 for population genetic analysis. The predicted SnTox5 amino acid sequences for each  
245 haplotype were aligned using the web-based sequence aligner MULTalign (Corpet, 1988) to  
246 identify amino acid sequence variation of the isoforms of SnTox5.

#### 247 ***Statistical analysis of variation in disease caused by different isoforms of SnTox5***

248 Analysis of variance (ANOVA) and Fisher’s least-significant difference (LSD) were calculated  
249 to compare virulence of SnTox5 isoforms that were harbored by more than ten isolates based on  
250 the average disease reaction on LP29. In addition, isolates harboring fourteen active isoforms  
251 were grouped based on the amino acid residues at the 155<sup>th</sup> and 156<sup>th</sup> position of SnTox5, and  
252 ANOVA and LSDs were calculated for each group based on the average disease reaction on  
253 LP29. To account for the unbalanced sample size, a type III ANOVA was calculated using the  
254 package ‘car v3.0-10’ (Fox and Weisberg, 2019) and the resulting sums of square was used to  
255 calculate the LSDs at 0.05 experimental significance level using the package ‘agricolae v1.33’  
256 (De Mendiburu, 2009) in the R programming environment in both analyses.

257 ***Temporal expression profile of SnTox5 during the infection process***

258 Secondary leaves of 14-day old ‘Lebsock’ were inoculated with Sn2000 and three samples of  
259 leaf tissue were collected at 4, 12, 24, 48, 72, 96, and 120 hours post-inoculation (hpi). Total  
260 RNA was extracted from leaves and purified using the RNeasy plant mini kit (Qiagen) according  
261 to the manufacturer’s protocol. RNA was quantified using a Qubit and 300 ng of total RNA from  
262 each time point was used to develop cDNA using the GoScript<sup>TM</sup> Reverse Transcription System  
263 (Promega). With the use of gene specific primers SnTox5\_qPCR\_F and SnTox5\_qPCR\_R,  
264 qPCR was performed for all timepoints with three biological and three technical replicates. The  
265 *P. nodorum* actin gene was amplified as the internal control using previously published primers  
266 (Liu et al. 2009) (Supplementary Table 1).

267 ***Laser confocal microscopic analysis of the infection process involving the SnTox5-Snn5***  
268 ***interaction***

269 A construct with the *mCherry* gene coupled to the promoter of *SnTox1* was cloned into the  
270 pFPL-Cg vector containing a geneticin resistance cassette using the Gateway cloning system  
271 (Gong et al. 2015). The construct was linearized using *PmeI* and concentrated to 1 µg/µl. *P.*  
272 *nodorum* strains Sn2000, Sn2kΔTox5-15, Sn79+Tox5-3 and Sn79-1087 were transformed with  
273 the linearized construct, as explained in Liu and Friesen (2012), and transformants were  
274 inoculated onto two-week-old plants of the SnTox5 differential wheat line LP29. In addition,  
275 Lebsock was inoculated with *P. nodorum* strains Sn2000 and Sn2kΔTox5-15. Two leaf samples  
276 were collected at 4, 12, 24, 48, 72, 96, and 120 hpi and a 2.5 cm-long cutting from the middle  
277 portion of each secondary leaf was placed on a glass slide. Ecomount mounting media (Biocare  
278 Medical, CA) was applied to the sample and a coverslip was placed on the sample without  
279 introducing any air bubbles. The slides were dried overnight under room temperature prior to

280 preservation at 2-8 °C. Three such replicates were conducted for each isolate-wheat line  
281 combination.

282 All the prepared slides were observed under an LSM700 laser scanning confocal microscope  
283 using 20x and 40x objectives where images captured under 20x were used for calculation of  
284 fungal mass and images captured under 40x were used to characterize the features of the  
285 infection process. Two different channels were used where the red channel ((Ex555/Em 639 nm)  
286 was assigned to capture the fluorescence emitted by mCherry and the green channel  
287 (Ex488/Em555 nm) was used for auto fluorescent detection of the leaf structure (Zeiss  
288 Thronwood, NY). To observe the infection process in different tissues within the leaf, Z-stack  
289 images were taken at different depths of the leaf from upper to lower epidermis with the use of  
290 ZEN.v. 11(Zeiss Thronwood, NY). The 2-D images were processed using Imaris v9.6 software  
291 (Bitplane, CT) for microscopic characterization and 3-D images were reconstructed using Imaris  
292 v9.6 for the volume analysis. Animated figures were created using the web-based application  
293 BioRender (BioRender.com). Average fungal volume was calculated after constructing the  
294 surface of the inoculated wheat leaf sample at a minimum of two infection sites per sample at  
295 each timepoint in one experimental replicate. Three such replicates were conducted, meaning the  
296 average volume was calculated for six infection sites per time point under the 20x objective lens.

297 ***Development of Snn5 mutants of LP29 and microscopic analysis of infection caused by***  
298 ***Sn2000 and Sn2k1Tox5-15***

299 The *Snn5* differential line, LP29, which carries the *Snn5* allele from Lebsock, was used for  
300 mutagenesis to generate LP29ems lines. LP29 seeds were treated with 0.25% ethyl  
301 methanesulfonate (EMS) in 0.05 M phosphate buffer as described in Williams et al. (1992). The  
302 M<sub>2</sub> generation was infiltrated with Sn2000K06-1 (Friesen et al. 2006) culture filtrates containing

303 SnTox5. Ten to fourteen M<sub>2</sub> individuals per M<sub>1</sub> were evaluated. Plants were scored for presence  
304 or absence of necrosis 5 days after infiltration. SnTox5-insensitive mutants were self-pollinated  
305 to obtain M<sub>3</sub>. LP29 M<sub>3</sub> families were infiltrated with Sn79+Tox5-3 culture filtrates to confirm  
306 insensitivity. M<sub>3</sub> and M<sub>4</sub> plants from the LP29 mutant line LP29ems931, hereafter designated  
307 LP29 $\Delta$ *snn5* were used in this study.

## 308 **Results**

### 309 ***Genome-wide association study (GWAS) identifies a SnTox5 candidate gene***

310 To identify candidate genes *SnTox5*, an association mapping approach was used to identify  
311 significant marker-trait associations in the *P. nodorum* genome using a natural population of 197  
312 *P. nodorum* isolates. The genotypic data for the GWAS analysis was generated by aligning the  
313 whole genome sequences of 197 *P. nodorum* isolates to the SnTox5-producing Sn2000 reference  
314 genome (Richards et al. 2018). A total of 1,026,859 SNPs and insertion/deletions were identified  
315 and after filtering, a final set of 402,601 high confidence markers were used in GWAS analysis.  
316 The 197 *P. nodorum* isolates were phenotyped on LP29, where the average disease reaction  
317 caused by each isolate ranged from 0 to 4.33 (Supplementary Table 2). Both genotypic and  
318 phenotypic data were used to perform GWAS analysis using both GAPIT and TASSEL v5  
319 applications and the most significant marker trait association was identified for a SNP ( $P=$   
320 6.71E-11) on chromosome 8 at the 53,300bp position. The most significant SNP resided in the  
321 gene *Sn2000\_06735* and therefore this gene became our *SnTox5* candidate (Figure 1).

322 The *Sn2000\_06735* gene spanned from 53,219 to 53,872 bp on chromosome 8 of the Sn2000  
323 genome (Figure 1) and was a 654bp intron-free gene with a putative TATA box 171 bps  
324 upstream of the start site (Supplementary Figure 1). The gene encoded a small secreted protein  
325 consisting of 217 amino acids with the first 22 amino acids predicted to be a signal peptide. A

326 putative Kex2 protease site was identified at the 67<sup>th</sup> amino acid, marking a putative 45 amino  
327 acid pro-sequence following the signal peptide. Sn2000\_06735 also contained six cysteine  
328 residues predicted by DiANNA1.1 (<http://clavius.bc.edu/~clotelab/DiANNA/>) to form three di-  
329 sulfide bridges (Figure 1). In addition, BLASTp analysis against the NCBI database showed that  
330 SnTox5 had 45.13% homology to SnTox3, and pairwise alignment between the two protein  
331 sequences showed that the six cysteine residues were conserved, suggesting that Sn2000\_06735  
332 had both sequence and structural similarity to SnTox3 (Supplementary Figure 2).

### 333 ***Deletion of Sn2000\_06735 converts virulence to avirulence in the presence of Snn5***

334 To validate that Sn2000\_06735 was SnTox5, Sn2000\_06735 was disrupted in *P. nodorum* isolate  
335 Sn2000 by inserting the hygromycin resistant cassette (*hyg<sup>R</sup>*) into Sn2000\_06735 using a  
336 CRISPR-Cas9 mediated gene disruption. The gene was successfully disrupted in five out of 24  
337 transformants evaluated. Two disruption isolates designated Sn2kΔTox5-10 and Sn2kΔTox5-15  
338 as well as an isolate with an ectopic insertion of *hyg<sup>R</sup>* designated Sn2k-ect7 were used for further  
339 analysis.

340 Sn2kΔTox5-10, Sn2kΔTox5-15, Sn2k-ect7 and the wild type isolate Sn2000 were inoculated  
341 onto LP29, the differential line for *Snn5*. Both Sn2000 and Sn2k-ect7 were able to induce typical  
342 necrotic lesions (Figure 2A). However, the two Sn2000\_06735 disrupted strains failed to cause  
343 necrosis on LP29 (Figure 2A). This suggested that Sn2000\_06735 was targeting *Snn5* to cause  
344 disease, therefore Sn2000\_06735 will hereafter be referred to as SnTox5.

345 *Snn5*, the susceptibility target for SnTox5, was originally mapped using the LP749 double  
346 haploid population infiltrating culture filtrates containing SnTox5 (Friesen et al. 2012). The  
347 LP749 population was therefore inoculated with Sn2kΔTox5-10, Sn2kΔTox5-15, Sn2k-ect7, and



348 the wild type isolate Sn2000. A significant QTL, previously described by Friesen et al. (2012),  
349 was identified on chromosomes 4B at the *Snn5* locus for both the wild type and ectopic strains  
350 (Figure 2D). In our experiment, the *Snn5* locus explained 33% and 32% of the variation in  
351 disease with LOD values of 10.31 and 9.65 for the disease caused by Sn2000 and Sn2k-ect7,  
352 respectively (Figure 2D, Table 1). In addition, the *Tsn1* locus explained 10% of the variation in  
353 disease caused by Sn2000 and 11% of the variation in disease caused by Sn2k-ect7 (Table 1).  
354 The significance of the *Snn5* locus was eliminated for the two *SnTox5* gene disruption mutants.  
355 As would be expected in the absence of the SnTox5-Snn5 interaction, the significance of *Tsn1*  
356 increased for both the mutants, explaining 26%-36% of the phenotypic variation with LOD  
357 values ranging from 7.82 to 12.3 (Figure 2D, Table 1).

### 358 ***Insertion of SnTox5 converts avirulence to virulence in the presence of Snn5***

359 *P. nodorum* isolate Sn79-1087 is avirulent on LP29, and the *SnTox5* gene is completely absent  
360 (Figure 2B). Transformation of Sn79-1087 with *SnTox5*, along with its native promoter,  
361 converted the transformed strains Sn79+Tox5-3 and Sn79+Tox5-4 into virulent strains on LP29  
362 (Figure 2B). Sn79+Tox5-3 caused an average disease reaction of 3.0 on Lebsock and an average  
363 disease reaction of 0 on PI94749, whereas Sn79-1087 (wild-type) showed no disease on either  
364 line.

365 The LP749 population segregated for disease caused by Sn79+Tox5-3 and subsequent analysis  
366 revealed a QTL at the *Snn5* locus with a LOD value of 27.00, explaining 66% of the disease  
367 variation (Figure 2D, Table 1). No other QTL were identified for this transformant, showing that  
368 SnTox5 was sufficient to cause disease in the presence of *Snn5*. The QTL analysis data from the  
369 LP749 population using the *SnTox5* disruption mutants and the *SnTox5* gain-of-function  
370 transformants further validated that *Sn2000\_06735* was *SnTox5*.

371 ***Isoform diversity of SnTox5 varies across geographical regions***

372 The 197 *P. nodorum* isolates were collected from spring, winter, and durum wheat producing  
373 regions of the US and were screened for presence/absence of *SnTox5* using whole genome  
374 resequencing. Of the 197 isolates, 149 (75.6%) contained greater than 50% of the *SnTox5* gene  
375 and 48 (24.4%) isolates lacked the gene. However, the possibility of false negative results due to  
376 the low sequencing coverage of the region cannot be completely ignored. Of the 149 isolates that  
377 harbored the *SnTox5* gene, 128 had a complete gene sequence with sufficient sequence coverage  
378 and were therefore used for further haplotype analysis. The 128 isolates consisted of 22  
379 nucleotide haplotypes resulting from polymorphisms at 118 nucleotide positions with an overall  
380 haplotype gene diversity ( $H_d$ ) of 0.861, indicating high levels of diversification of *SnTox5* within  
381 the US natural population. Haplotypes 17,18, 19, 20, 21, and 22, which were found in eleven of  
382 the isolates, contained a premature stop codon (Table 3). These haplotypes with a premature stop  
383 codon accounted for 105 polymorphic sites where the nature of polymorphisms indicated the  
384 presence of repeat induce polymorphism within *SnTox5*. Of the remaining 117 isolates with  
385 functional *SnTox5* haplotypes, 47 were found in the Upper Midwest population (44.76% of the  
386 Upper Midwest isolates), 47 were found in the South/East population (70.15 % of the South/East  
387 isolates) , 7 were found in the Oregon population (87.5 % of Oregon isolates), and 17 were found  
388 in the Oklahoma population (100 % of Oklahoma isolates).

389 The Upper Midwest population, which included the reference isolate Sn2000, consisted of five  
390 haplotypes defined by six non-synonymous and two synonymous polymorphisms (Table 2). A  
391 nucleotide diversity ( $P_i$ ) of 0.00109 was observed in the Upper Midwest population, which was  
392 lower than that of the South/East population. The South/East population consisted of nine  
393 haplotypes defined by seven non-synonymous and one synonymous polymorphism. The

394 nucleotide diversity within the South/East population was calculated at 0.00327, higher than that  
395 of the Upper Midwest population.

396 The calculated pN/pS ratio for the Upper Midwest population was 0.95 (Table 2), however the  
397 calculated pN/pS ratio for the South/East population was substantially higher at 2.22 (Table 2),  
398 suggesting that SnTox5 was undergoing purifying selection in the Upper Midwest but strong  
399 diversifying selection in the South/East. Calculation of the pN/pS ratios only for the mature  
400 protein coding region of the gene gave similar results with pN/pS ratios of 0.47 and 1.89 for the  
401 Upper Midwest and South/East population respectively (Table 2). The pN/pS ratios were not  
402 calculated for the Oklahoma population due to a complete lack of synonymous SNPs. However,  
403 in the Oklahoma population, six nonsynonymous mutations were identified in the complete gene  
404 with five of these affecting the mature protein indicating diversifying selection pressure in this  
405 region. The Oregon population was made up of a single haplotype and therefore no calculation  
406 was possible. These results indicated that SnTox5 was undergoing different types of selection in  
407 different regions of the United States, likely adapting to the locally planted cultivars.

#### 408 ***SnTox5 isoform variation contributes to quantitative levels of virulence***

409 The 22 haplotypes encoded 20 different isoforms of SnTox5 (Supplementary Figure 3). Three  
410 active and five inactive isoforms of SnTox5 were identified in the Upper Midwest population  
411 (n=56), where isoform 1 was the most prevalent at 60.71% (Figure 3). Furthermore, 94.44% of  
412 the isolates that harbored isoform 1 were from the Upper Midwest population. The  
413 Southern/Eastern population (n=48) harbored nine isoforms (eight active and one inactive) with  
414 isoform 2 and 3 representing 35.42% and 33.33% of the population, respectively (Figure 3). In  
415 addition, 70.83% of the isolates that contained isoform 2 and 100% of the isolates that contained  
416 isoform 3 were from the South/East population (Figure 3). The *P. nodorum* population from

417 Oklahoma (n=17) harbored eight isoforms (Figure 3). Isoform 5 was the most prevalent form of  
418 the Oklahoma population, consisting of 35.29% of the population. The Oregon population  
419 consisted of only seven isolates where all of them harbored isoform 2 (Figure 3). No isoform  
420 was identified in all four of the populations. Like the haplotype analysis, the isoform analysis  
421 shows a higher diversity in SnTox5 in the South/East and Oklahoma populations compared to the  
422 Upper Midwest population.

423 To examine the likely effect of non-synonymous substitutions on virulence, SnTox5 isoforms  
424 produced by greater than 10 individuals were statistically analyzed based on their average  
425 disease reaction on LP29. Therefore, isoforms 1, 2, 3, and 4 that were represented by 36, 24, 16  
426 and 12 isolates, respectively, were used. The reference isolate Sn2000 produced isoform 1 and  
427 was included in the 36 isolates with isoform 1 for this analysis. Isolates expressing isoform 1  
428 (produced by 34 isolates from the Upper Midwest and two isolates from Oklahoma) and isoform  
429 4 (produced by five isolates from the Upper Midwest, one isolate from Oklahoma and six  
430 isolates from South/East population) caused average disease reactions of 2.27 and 2.23,  
431 respectively on LP29, and were not significantly different from each other (Table 3). The isolates  
432 producing isoform 2 (produced by seven isolates from Oregon and 17 isolates from the  
433 South/East population) and the isolates producing isoform 3 (produced by 16 isolates only from  
434 the South/East population) showed an average disease reaction of 2.96 and 3.36, respectively, on  
435 LP29. The average disease reactions of isolates producing isoform 3 were significantly higher  
436 than those producing isoform 2 at the 0.05 level of probability (Table 3). Average disease  
437 reactions of isolates harboring both isoform 2 and 3, had significantly higher average disease  
438 reactions than those of isoforms 1 and 4 at the 0.05 level of probability (Table 3) indicating that  
439 variation in the SnTox5 amino acid complement influenced the level of virulence of the isolates

440 producing them, likely due to the direct or indirect interaction with Snn5. Analysis of the amino  
441 acid sequence of each isoform showed that isoform 2 had a T155R substitution and isoform 3  
442 had a T155K substitution compared to isoforms 1 and 4 suggesting that the amino acid at the  
443 155<sup>th</sup> position contributed significantly to the variation in average disease reaction (Figure 4).  
444 When comparing all 14 active SnTox5 isoforms, amino acid substitutions were frequently  
445 observed at the 155<sup>th</sup> and 156<sup>th</sup> amino acid positions (Figure 4). Three amino acids including  
446 threonine (T), arginine (R), and lysine (K), were observed at the 155<sup>th</sup> position and two amino  
447 acids including asparagine (N) and serine (S) were observed at the 156<sup>th</sup> position (Table 4).  
448 Isolates of the 14 isoforms were assembled into groups based on the amino acids at the 155<sup>th</sup> and  
449 156<sup>th</sup> positions and amino acid combinations of T-N, R-S, K-S, and K-N showed average disease  
450 reactions of 2.31, 2.95, 2.95 and 3.20, respectively (Table 4). Isolates with R-S, K-S, and K-N  
451 substitutions caused significantly higher average disease reaction compared to the T-N  
452 substitution, suggesting that variation in amino acid residues at these two positions contributed  
453 significantly to the virulence of the isolates producing them.

454 SnTox5 isoforms with a premature stop codon showed average disease reactions ranging from 0-  
455 1.17 on LP29 (Table 3) showing that isolates with a truncated SnTox5 failed to cause disease on  
456 LP29. These results indicated that SnTox5 may be evolving to become a more effective protein,  
457 increasing the virulence of the pathogen.

#### 458 ***SnTox5 expression peaks after penetration but prior to visible lesions***

459 To examine the expression profile of *SnTox5* throughout the infection cycle, RT-qPCR was  
460 performed using *in-planta* samples. Expression of *SnTox5* in Sn2000 was analyzed at 4, 12, 24,  
461 48, 72, 96, and 120 hpi on the durum wheat cultivar Lebsock. *SnTox5* expression peaked at 24

462 hpi, prior to the onset of lesions that typically became visible between 48 and 72 hpi (Figure 5).

463 At 24 hpi, *SnTox5* was expressed approximately six times that of the *actin* gene. The expression  
464 of *SnTox5* gradually decreased with the progression of the disease before it returned to levels like  
465 that of *actin* at 120 hpi where the pathogen had already colonized the mesophyll tissue (Figure  
466 5).

#### 467 ***Laser confocal microscopy shows that SnTox5 facilitates complete colonization of LP29***

468 To visualize the effect of the *SnTox5-Snn5* interaction on penetration and colonization of the leaf  
469 cell layers, fluorescently labeled *P. nodorum* strains Sn2000, Sn2kΔ*Tox5*-15, Sn79+*Tox5*-3 and  
470 Sn79-1087 were inoculated onto LP29. The infection process of each strain was observed using  
471 laser scanning confocal microscopy at seven different time points post-inoculation. Germination  
472 of spores of all four strains was visible within 4 hpi (Figure 6 and Figure 7). At 12 hpi,  
473 penetration of the leaf surface was also visible for all four strains, however, it was clear that  
474 strains that contained *SnTox5* had increased penetration compared to strains that lacked *SnTox5*  
475 (Figure 6 and Figure 7).

476 At 48 hpi, all strains were able to colonize the epidermal tissue and Sn2000 and Sn79+*Tox5*-3  
477 had initiated colonization of the vascular and mesophyll tissue, however, neither Sn2kΔ*Tox5*-15  
478 nor Sn79-1087 were ever able move past the epidermal layer (Figure 6 and Figure 7). For  
479 Sn2000 and Sn79+*Tox5*-3 the breakdown of chloroplasts in the mesophyll cells surrounded by  
480 the fungal hyphae was observed at 72 hpi, turning chloroplasts from green to yellow (Figure 6  
481 and Figure 7). Deterioration of the chloroplasts was followed by the shrinking and total collapse  
482 of the surrounded mesophyll cells at the 96 and 120 hpi time points (Figure 6 and Figure 7). By  
483 120 hpi, the majority of the mesophyll tissue was colonized by both Sn2000 and Sn79+*Tox5*-3.  
484 It was evident that Sn2000 colonized more tissue than that of Sn79+*Tox5*-3 at 120 hpi,

485 indicating that additional virulence factors effective on wheat may be present in Sn2000 that are  
486 not present in the avirulent Sn79-1087 (Figure 6 and Figure 7).

487 Even though Sn2k $\Delta$ Tox5-15 and Sn79-1087 lacked *SnTox5*, both penetrated the epidermis by 24  
488 hpi. Extensive colonization of the epidermis was observed by 96 hpi, similar to Sn2000 and  
489 Sn79+Tox5-3. However, unlike Sn2000 and Sn79+Tox5-3, Sn2k $\Delta$ Tox5-15 and Sn79-1087 were  
490 unable to colonize the mesophyll tissue or the vascular tissue of the leaf (Figure 6 and Figure 7).

491 Typically, lesions started to appear on the leaves between 48 and 72 hpi, correlating with the  
492 colonization of the mesophyll tissue. Until *P. nodorum* started to colonize the mesophyll tissue,  
493 the leaf remained green. Both Sn2k $\Delta$ Tox5-15 and Sn79-1087 failed to produce lesions on  
494 inoculated leaves. In contrast, Sn2000 and Sn79+Tox5-3 were able to reach the mesophyll and  
495 vascular tissue by 48-72 hpi, coinciding with the emergence of visible leaf necrosis.

496 As a proxy for fungal fitness, the fungal volume of Sn2000 and Sn2k $\Delta$ Tox5-15 were measured at  
497 12, 24, 48, 72, 96, and 120 hpi (Figure 8A). The volume of Sn2000 gradually increased on LP29  
498 over time as expected, however, the volume of Sn2k $\Delta$ Tox5-15 on LP29 remained constant from  
499 12 to 120 hpi. The volume of Sn2000 started to increase significantly at 24 hpi, coinciding with  
500 the upregulation of *SnTox5* and fungal colonization of the mesophyll layer (Figure 6, 8A).

501 Collectively, the microscopic analysis of leaf penetration and colonization showed that SnTox5  
502 clearly facilitates colonization of the mesophyll layer of the leaf, followed by PCD through its  
503 targeting of the *Snn5* pathway, providing nutrient for the completion of its pathogenic life cycle.

504 ***SnTox5 facilitates colonization of the epidermal layer of LP29 even in the absence of Snn5***

505 To further analyze the function of the *SnTox5-Snn5* interaction, we inoculated Sn2000 and the  
506 Sn2k $\Delta$ Tox5-15 mutant on LP29 and its *Snn5* disruption mutant LP29 $\Delta$ snn5. At 120 hpi, Sn2000



507 was able to colonize both the epidermis and the mesophyll tissue as described above (Figure 9).  
508 In the Sn2000 inoculation of LP29 $\Delta$ snn5, Sn2000 was able to progress into the mesophyll tissue,  
509 however, unlike the Sn2000 - LP29 inoculation, the fungus was not able to induce PCD and was  
510 only observed to advance into the first two cell layers of the mesophyll tissue. As mentioned  
511 above, *SnTox5* mutants of Sn2000 were only able to penetrate and colonize the epidermal tissue  
512 of LP29. At 120 hpi, spores of Sn2k $\Delta$ Tox5-15 were able to form germ tubes on LP29 $\Delta$ snn5.  
513 Unexpectedly, Sn2k $\Delta$ Tox5-15 was not even able to penetrate the epidermal tissue of  
514 LP29 $\Delta$ snn5, even up to 120 hpi (Figure 9). More work will need to be done on this interaction to  
515 understand the role of *Snn5* in penetration in the absence of SnTox5.

#### 516 ***Laser confocal analysis of Sn2000 and Sn2k $\Delta$ Tox5-15 on Lebsock***

517 To further evaluate the additive nature of SnTox5-*Snn5* and SnToxA-*Tsn1* interactions, we  
518 analyzed the infection process of Sn2000 and Sn2k $\Delta$ Tox5-15 on Lebsock, which carries both  
519 *Tsn1* and *Snn5*. Both Sn2000 and Sn2k $\Delta$ Tox5-15 were able to penetrate and colonize the  
520 epidermis of the wheat line Lebsock within 24 hpi (Figure 10). Sn2000 was able to penetrate the  
521 mesophyll layer by 48 hpi (Figure 10). However, Sn2k $\Delta$ Tox5-15 did not reach the mesophyll  
522 tissue until 96 hpi (Figure 10) showing that the SnTox5-*Snn5* interaction was facilitating a more  
523 rapid colonization of the mesophyll tissue than the SnToxA-*Tsn1* interaction alone.

524 Calculation of the fungal volume of Sn2000 and Sn2k $\Delta$ Tox5-15 in Lebsock, clearly showed that  
525 even though both strains were able to colonize the mesophyll tissue, Sn2000 had significantly  
526 higher fungal volume compared to that of the Sn2k $\Delta$ Tox5-15, starting at 48 hpi and continuing  
527 through the 120 hpi time point (Figure 8B). In addition, calculation of fungal volume at each  
528 time point showed that the rate of the increase in fungal volume was present at 24 hpi for  
529 Sn2000, whereas the fungal volume did not increase until 72 hpi for Sn2k $\Delta$ Tox5-15 (Figure 8B).



530 These results suggest once again, SnTox5 is facilitating entry into the mesophyll and that  
531 establishment of one NE- sensitivity gene interaction is sufficient to colonize the mesophyll  
532 layer, but the two interactions act synergistically during the colonization process to increase  
533 pathogen fitness and therefore, the rate of colonization.

534

535

## 536 **Discussion**

537 *P. nodorum* is a necrotrophic fungal pathogen that deploys a plethora of necrotrophic effectors  
538 (NEs) to induce programmed cell death (PCD) on susceptible wheat lines. In this study, we  
539 performed GWAS on a *P. nodorum* natural population of 197 isolates, to identify *Sn2000\_06735*  
540 as a candidate for *SnTox5*. We subsequently used CRISPR/Cas9 mediated gene editing to disrupt  
541 the gene and gain-of -function transformation to complement the gene showing that  
542 *Sn2000\_06735* was both sufficient and necessary to cause disease on LP29, the *Snn5* differential  
543 line.

544 Phenotyping, and subsequent QTL analysis on the LP749 population that segregated for  
545 sensitivity to SnTox5, showed that the disruption of *Sn2000\_06735* eliminated any disease  
546 association with *Snn5*. Sn79-1087 also had no disease association with *Snn5*, however, strong  
547 disease association with *Snn5* was detected when inoculated with the Sn79-1087 strain that was  
548 transformed with *Sn2000\_06735*. Therefore, GWAS, gene disruption, gain-of-function  
549 transformation, and QTL analysis on the LP749 wheat population validated that *Sn2000\_06735*  
550 was *SnTox5*.

551 *SnTox5* encodes an immature 217 amino acid small secreted protein that harbors a 22 amino acid  
552 secretion signal and a putative 45 amino acid pro-sequence that is cleaved at a predicted Kex2  
553 protease cleavage site. BLASTp search with the *SnTox5* amino acid sequence showed that  
554 *SnTox3* was the only hit in the NCBI non-redundant database and only showed 45% homology.  
555 Although this is not a high level of homology, it is interesting that *SnTox3* is also a pre-pro  
556 protein with a Kex2 cleavage site (Liu et al. 2009; Outram et al. 2020) and structural homology  
557 is also observed based on similar placement of the cysteine residues, indicating a potentially  
558 similar mature protein structure. The Kex2 protease is unique to fungi and Outram et al. (2020)  
559 showed that Kex2-processed pro-domain (K2PP) effectors were common in pathogenic fungi  
560 and included the *P. nodorum* effectors *SnTox3* and *SnToxA* and now *SnTox5*. Outram et al.  
561 (2020) also presented the crystal structure of *SnTox3* and experimentally demonstrated that the  
562 Kex2-processed pro-domain was critical for *SnTox3* folding and activity. The validation of  
563 *SnTox5* provides another K2PP effector interaction for further study of this class of effectors.  
564 Among the *P. nodorum* isolates used in this study, 75.6% harbored a functional *SnTox5* gene.  
565 The level of prevalence observed for *SnTox5* was only slightly higher than that of *SnToxA* and  
566 *SnTox3*, which were found in 63.4% and 58.9% of the isolates in the same collection used in this  
567 study, respectively (Richards et al. 2019). In contrast, the presence of *SnTox5* was less compared  
568 to the prevalence of *SnTox1* and *SnTox267* in the same population, which was 95.4% for each  
569 (Richards et al. 2019; Richards et al. 2021). The ability to target multiple host susceptibility  
570 genes such as in *SnTox267* (Richards et al. 2021) or *SnTox3* (Friesen et al. 2008; Zhang et al.  
571 2011; Zhang et al. 2021), the existence of a secondary function such as the ability of *SnTox1* to  
572 bind chitin (Liu et al. 2016) or *SnTox3* to target PR1 proteins (Sung et al. 2020), or the  
573 prevalence of host susceptibility genes in the planted wheat of a given region (Richards et al.

574 2019), all likely govern the frequency of an effector gene in a fungal population. Therefore,  
575 prevalence of *SnTox5* in the majority of *P. nodorum* isolates collected from the Upper Midwest,  
576 Oklahoma, Oregon and South/East regions of US suggests the prevalence of *Snn5* in wheat  
577 planted in these regions or an additional function that drives the maintenance of this gene.

578 Richards et al. (2019) used the same US *P. nodorum* population to show that genes predicted to  
579 encode effectors were under stronger diversifying selection compared to genes encoding for  
580 secreted non-effectors or non-secreted proteins. Richards et al. (2019) also compared the Upper  
581 Midwest and South/East populations to show that several effector genes were under diversifying  
582 selection in one population but under purifying selection in the other population(s). One of these  
583 genes was SnTox3 which was under purifying selection in the South/East population and  
584 diversifying selection in the Upper Midwest population. Here we show that SnTox5 is under  
585 purifying selection in the Upper Midwest but diversifying selection in the South/East population,  
586 the opposite of SnTox3. Because the Upper Midwest wheat region is predominately spring wheat  
587 and the South/East wheat region is predominately winter wheat, the locally planted cultivars are  
588 vastly different. These differences include the complement of effector targets (e.g. *Snn3* for  
589 SnTox3 and *Snn5* for SnTox5) present in the local cultivars (Crook et al. 2012). Additionally, it  
590 is likely that population specific alleles of *Snn3* and *Snn5* exist that may be driving the  
591 diversification of both SnTox3 and SnTox5 in their respective populations.

592 *P. nodorum* isolates harboring a diversity of active isoforms of the SnTox5 protein were  
593 evaluated for disease reaction on the *Snn5* differential line LP29. Isolates harboring SnTox5  
594 isoforms predominately from the South/East winter wheat growing regions were significantly  
595 more virulent on LP29 than isolates harboring isoforms that were prevalent in the Upper  
596 Midwest spring wheat and durum wheat regions. No isolates producing the most virulent two

597 isoforms were identified in the Upper Midwest population indicating that the genetic background  
598 of the winter wheat *P. nodorum* population of the South/East is likely the selection pressure  
599 driving this diversity and the increased virulence.

600 The importance of critical amino acid residues in *P. nodorum*-wheat effector-target gene  
601 interactions have been reported for SnToxA (Meinhardt et al. 2002; Lu et al. 2014) and SnTox3  
602 (Sung et al. 2021). A total of 14 active isoforms of SnTox5 were identified in our natural  
603 population. Of the four major isoforms, isolates carrying isoforms with T155K and T155R amino  
604 acid substitutions caused significantly higher disease. Threonine (T) is neutral in its  
605 hydrophobicity whereas both lysine (K) and arginine (R) are highly hydrophilic residues.  
606 Therefore, increase in the hydrophilicity at the 155<sup>th</sup> position appears to result in an increase in  
607 virulence of the isolates producing these isoforms. Amino acid residues at the 156<sup>th</sup> position were  
608 also variable and consisted of either serine (S) or asparagine (N). The highest average disease  
609 reaction was observed when position 155 and 156 were occupied by K and N compared to K and  
610 S, respectively, however, these differences were not significant at a 0.05 level of probability.  
611 Based on our results, we hypothesize that the amino acid residues at position 155 and possibly  
612 156 are under selection and are critical to the effectiveness of the protein in the SnTox5-*Snn5*  
613 interaction.

614 SnTox5 expression peaked early with its highest expression at 24 hpi with a gradual decrease  
615 through 120 hpi (Figure 5). This expression pattern indicated that SnTox5 was likely involved in  
616 the early colonization of the leaf including the initial colonization of the mesophyll, which is  
617 initiated at 24 hpi and continues through 120 hpi (Figure 6).

618 Laser scanning confocal microscopy was then used to evaluate the importance of SnTox5 in the  
619 various stages of infection. At 48 hpi, all strains with or without *SnTox5* were able to colonize

620 the epidermal layer, indicating that SnTox5 was not necessary to colonize the epidermal layer of  
621 LP29. The visible differences in colonization began at 48 hpi where the strains producing  
622 SnTox5 were able to begin colonizing the mesophyll layer but those strains not producing  
623 SnTox5 were not.

624 To further investigate the function of SnTox5 in the presence and absence of *Snn5*, four  
625 combinations were evaluated using laser confocal microscopy including 1) Sn2000 (SnTox5) on  
626 LP29 (*Snn5*), 2) Sn2000 (SnTox5) on LP29 $\Delta$ *snn5* (no *Snn5*), 3) Sn2k $\Delta$ Tox5 (no SnTox5) on  
627 LP29 (*Snn5*) and 4) Sn2k $\Delta$ Tox5 (no SnTox5) on LP29 $\Delta$ *snn5* (no *Snn5*). In combination 1 the  
628 presence of *Snn5* and the production of SnTox5 resulted in full colonization of the epidermis and  
629 mesophyll and complete cellular breakdown by 120 hpi. In combination 2, where SnTox5 was  
630 produced but *Snn5* was absent, mycelium penetrated the epidermis as well as initiating the  
631 colonization of the first layers of the mesophyll, but mesophyll colonization was halted  
632 prematurely, likely due to the lack of PCD. In combination 3, where SnTox5 was not produced  
633 but *Snn5* was present, the pathogen was able to penetrate and colonize the epidermis, however,  
634 no colonization of the mesophyll was ever observed. In combination 4, an unexpected result was  
635 found. The combination of Sn2k $\Delta$ Tox5 and LP29 $\Delta$ *snn5* eliminated both the production of  
636 SnTox5 and the *Snn5* host gene. Our expectation was that the Sn2k $\Delta$ Tox5 strain would penetrate  
637 like combination 3 due to the lack of SnTox5, however, no penetration was observed in any of  
638 the leaves examined. This result was puzzling, so it was repeated several times with the same  
639 result each time. Our only explanation for this phenomenon is that *Snn5* is somehow involved in  
640 communication with the pathogen but working out a model to explain this will require further  
641 work, including the cloning of *Snn5*. Combinations 1 through 3 along with the previous results

642 on LP29, strongly suggested that SnTox5 is facilitating the colonization of the mesophyll layer  
643 even in the absence of the PCD induced by the SnTox5-*Snn5* interaction.

644 To evaluate the role of SnTox5 and *Snn5* in the presence of SnToxA and *Tsn1*, we used laser  
645 confocal microscopy to collect fungal volume data and to visualize the pathogen movement of *P.*  
646 *nodorum* isolate Sn2000 (SnToxA/SnTox5) and the *SnTox5*-disrupted mutant Sn2kΔTox5  
647 (SnToxA only) on the durum wheat line Lebsock (*Tsn1/Snn5*) (Figure 10). Sn2000 behaved as  
648 presented previously where it began colonization of the mesophyll at 48 hpi with cell death  
649 beginning to be visible at 72 hpi and complete colonization and cellular disruption by 120 hpi.  
650 Sn2kΔTox5, which produces SnToxA but not SnTox5 could not breach the mesophyll layer at 48  
651 or 72 hpi but did begin to colonize the mesophyll by 96 hpi with more advanced colonization by  
652 the 120 hpi timepoint. Although SnToxA does target the susceptibility gene *Tsn1* to induce PCD,  
653 having SnTox5 facilitates an earlier (by as much as 48 h) and stronger colonization of the  
654 mesophyll resulting in earlier PCD and therefore faster acquisition of cellular nutrients needed to  
655 complete the fungus' life cycle. This combination reiterates that SnTox5 is facilitating mesophyll  
656 colonization, a role that is not replicated by SnToxA.

657 We are hypothesizing that SnTox5 has a secondary effector function that facilitates entry into the  
658 mesophyll that is important prior to its necrotrophic effector function that targets *Snn5*. This  
659 hypothesis is supported by results including the peak expression of SnTox5 at 24 hpi, a time  
660 point where the pathogen is initiating penetration into the mesophyll as well as the multiple  
661 pathogen strain – host genotype combinations that highlight the roles of *Snn5* and SnTox5.  
662 These include 1) *P. nodorum* isolate Sn2000 was able to enter the mesophyll of LP29 in the  
663 presence or absence of *Snn5*, however, SnTox5 nonproducing strains of these same isolates  
664 including Sn79-1087 and Sn2kΔTox5 were limited to the epidermis. 2) Inoculations of Sn2000

665 (SnToxA/SnTox5) and Sn2k $\Delta$ Tox5 (SnToxA alone) on the durum wheat cultivar Lebsock  
666 (*Tsn1/Snn5*) showed that Sn2000 penetrated and colonized both the epidermal and mesophyll  
667 layers by 48 hpi, however, Sn2k $\Delta$ Tox5 which only has *SnToxA* was not able to initiate  
668 colonization of the mesophyll layer until 96 hpi, indicating that SnTox5 was responsible for the  
669 rapid colonization of the mesophyll and that SnToxA was not nearly as efficient in this regard.

670 In this study we used GWAS with 197 *P. nodorum* isolates to identify a SnTox5 candidate gene  
671 followed by gain-of-function transformation and CRISPR-Cas9 based gene disruption for  
672 validation of the SnTox5 candidate. Using the same US population of *P. nodorum* isolates that  
673 collected from both winter and spring wheat regions of the US showed that the *SnTox5* gene was  
674 under purifying selection in the spring wheat growing region but under diversifying selection in  
675 the South/East US and Oklahoma winter wheat growing regions. One region of *SnTox5* was  
676 under strong diversifying selection and the two amino acid residues encoded by this region was  
677 contributing quantitatively to virulence. Additionally, we have shown multiple lines of evidence  
678 that SnTox5 is clearly facilitating early colonization of the mesophyll. Our current working  
679 model is that SnTox5 expression peaks early (24 hpi) where it facilitates the colonization of the  
680 mesophyll as early as 48 hpi, putting the pathogen in position to obtain nutrients that are a result  
681 of the SnTox5-*Snn5* induced PCD.

## 682 **References**

- 683 Abeysekara, N.S., Friesen, T.L., Keller, B., and Faris, J. D. (2009). Identification and  
684 characterization of a novel host-toxin interaction in the wheat-*Stagonospora nodorum*  
685 pathosystem. *Theor. Appl. Genet.* 120:117-126.
- 686 Balint-Kurti, P. (2019). The plant hypersensitive response: concepts, control and  
687 consequences. *Mol. Plant Pathol.* 20:1163-1178.
- 688 Bolger, A.M., Lohse, M. and Usadel, B. (2014). Trimmomatic: a flexible trimmer for Illumina  
689 sequence data. *Bioinformatics.* 30: 2114-2120.
- 690 Bradbury, P.J., Zhang, Z., Kroon, D.E., Casstevens, T.M., Ramdoss, Y. and Buckler, E.S.  
691 (2007). TASSEL: software for association mapping of complex traits in diverse  
692 samples. *Bioinformatics.* 23:2633-2635.
- 693 Breen, S., Williams, S.J., Winterberg, B., Kobe, B., and Solomon, P.S. (2016). Wheat PR-1  
694 proteins are targeted by necrotrophic pathogen effector proteins. *Plant J.* 88: 13–25.
- 695 Ciuffetti, L., M., Tuori, R., P., and Gaventa, J., M. (1997). A single gene encodes a selective  
696 toxin causal to the development of tan spot of wheat. *Plant Cell.* 9:135–144.
- 697 Crook, A. D., Friesen, T. L., Liu, Z. H., Ojiambo, P. S., and Cowger, C. (2012). Novel  
698 necrotrophic effectors from *Stagonospora nodorum* and corresponding host genes in  
699 winter wheat germplasm in the Southeastern U.S. *Phytopathology.* 102:498-505.
- 700 De Mendiburu Delgado, F. (2009). Una herramienta de análisis estadístico para la investigación  
701 agrícola.
- 702 Dodds, P.N. and Rathjen, J.P. (2010). Plant immunity: towards an integrated view of plant–  
703 pathogen interactions. *Nat. Rev. Genet.* 11:539-548.
- 704 Faris, J.D., Zhang, Z., Lu, H., Lu, Z., Reddy, L., Cloutier, S., Fellers, J.P., Meinhardt, S.W.,  
705 Rasmussen, J.B., Xu, S.S., Oliver, R.P., Simons, K.J., and Friesen, T.L. (2010) A unique  
706 wheat disease resistance-like gene governs effector-triggered susceptibility to  
707 necrotrophic pathogens. *Proc. Natl. Acad. Sci.* 107:13544-13549.
- 708 Faris, J.D., Liu, Z., and Xu, S.S. (2013). Genetics of tan spot resistance in wheat. *Theor. Appl.*  
709 *Genet.* 126: 2197-2217.
- 710 Faris, J.D., and Friesen, T.L. (2020). Plant genes hijacked by necrotrophic fungal  
711 pathogens. *Curr. Opin. Plant Biol.* 56:74-80.
- 712 Flor, H.H. (1971). Current status of the gene-for-gene concept. *Annu. Rev. Phytopathol.* 9:275–  
713 296.
- 714 Foster, A.J., Martin-Urdiroz, M., Yan, X., Wright, H.S., Soanes, D.M. and Talbot, N.J., (2018).  
715 CRISPR-Cas9 ribonucleoprotein-mediated co-editing and counterselection in the rice  
716 blast fungus. *Sci. Rep.* 8:1-12.



- 717 Fox, J. and Weisberg, S. (2018). An R companion to applied regression. Sage publications.
- 718 Franceschetti, M., Maqbool, A., Jiménez-Dalmaroni, M.J., Pennington, H.G., Kamoun, S., and  
719 Banfield, M.J. (2017). Effectors of filamentous plant pathogens: commonalities amid  
720 diversity. *Microbiol. Mol. Biol. Rev.* 81: e00066-16.
- 721 Friesen, T.L., Stukenbrock, E.H., Liu, Z., Meinhardt, S., Ling, H., Faris, J.D., Rasmussen, J.B.,  
722 Solomon, P.S., McDonald, B.A., and Oliver, R.P. (2006). Emergence of a new disease as  
723 a result of interspecific virulence gene transfer. *Nat. Genet.* 38:953-956.
- 724 Friesen, T.L., Meinhardt, S.W., and Faris, J.D. (2007). The *Stagonospora nodorum*-wheat  
725 pathosystem involves multiple proteinaceous host-selective toxins and corresponding  
726 host sensitivity genes that interact in an inverse gene-for-gene manner. *Plant J.* 51:681-  
727 692
- 728 Friesen, T.L., Zhang, Z., Solomon, P.S., Oliver, R.P., and Faris, J.D. (2008). Characterization of  
729 the interaction of a novel *Stagonospora nodorum* host-selective toxin with a wheat  
730 susceptibility gene. *Plant Physiol.* 146:682-693.
- 731 Friesen, T.L., and Faris, J.D. (2010). Characterization of the wheat-*Stagonospora nodorum*  
732 system: what is the molecular basis of this quantitative necrotrophic disease interaction?  
733 *Can. J. Plant Pathol.* 32:20-28.
- 734 Friesen, T.L., Chu, C., Xu, S.S., and Faris, J.D. (2012) SnTox5-*Snn5*: a novel *Stagonospora*  
735 *nodorum* effector-wheat gene interaction and its relationship with the SnToxA-*Tsn1* and  
736 SnTox3-*Snn3-B1* interactions. *Mol. Plant Pathol.* 13:1101-1109.
- 737 Friesen, T.L., and Faris, J.D. (2012). Characterization of plant-fungal interactions involving  
738 necrotrophic effector-producing plant pathogens. In *Plant fungal pathogens* (pp. 191-  
739 207). Humana Press.
- 740 Gao, Y., Faris, J.D., Liu, Z., Kim, Y.M., Syme, R.A., Oliver, R.P., Xu, S.S., and Friesen, T.L.  
741 (2015). Identification and characterization of the SnTox6-*Snn6* interaction in the  
742 *Parastagonospora nodorum*-wheat pathosystem. *Mol. Plant-Microbe Interact.* 28: 615-  
743 625.
- 744 Gao, Y., Liu, Z., Faris, J.D., Richards, J., Brueggeman, R.S., Li, X., Oliver, R.P., McDonald,  
745 B.A. and Friesen, T.L. (2016). Validation of genome-wide association studies as a tool to  
746 identify virulence factors in *Parastagonospora nodorum*. *Phytopathology.* 106:1177-  
747 1185.
- 748 Gong, X., Hurtado, O., Wang, B., Wu, C., Yi, M., Giraldo, M., Valent, B., Goodin, M., and  
749 Farman, M. (2015). pFPL vectors for high-throughput protein localization in fungi:  
750 detecting cytoplasmic accumulation of putative effector proteins. *Mol. Plant-Microbe*  
751 *Interact.* 28:107-121.
- 752 Joehanes, R., and Nelson, J.C. (2008). QGene 4.0, an extensible Java QTL-analysis  
753 platform. *Bioinformatics.* 24:2788-2789.

- 754 Jones, J.D.G., and Dangl, J.L. (2006) The plant immune system. *Nature*. 444:323-329
- 755 Khan, H., McDonald, M.C., Williams, S.J. and Solomon, P.S. (2020). Assessing the efficacy of  
756 CRISPR/Cas9 genome editing in the wheat pathogen *Parastagonospora nodorum*. *Fungal*  
757 *Biol. Biotechnol.* 7:1-8.
- 758 Langner, T., Kamoun, S., and Belhaj, K. (2018). CRISPR crops: plant genome editing toward  
759 disease resistance. *Annu. Rev. Phytopathol.* 56:479-512.
- 760 Li, H., Handsaker, B., Wysoker, A., Fennell, T., Ruan, J., Homer, N., Marth, G., Abecasis, G.  
761 and Durbin, R. (2009). The sequence alignment/map format and  
762 SAMtools. *Bioinformatics.* 25:2078-2079.
- 763 Li, H. (2013). Aligning sequence reads, clone sequences and assembly contigs with BWA-  
764 MEM. arXiv preprint arXiv:1303.3997.
- 765 Lipka, A.E., Tian, F., Wang, Q., Peiffer, J., Li, M., Bradbury, P.J., Gore, M.A., Buckler, E.S.,  
766 and Zhang, Z. (2012). GAPIT: genome association and prediction integrated  
767 tool. *Bioinformatics.* 28:2397-2399.
- 768 Liu, Z.H., Faris, J.D., Meinhardt, S.W., Ali, S., Rasmussen, J.B., and Friesen, T.L. (2004)  
769 Genetic and physical mapping of a gene conditioning sensitivity in wheat to a partially  
770 purified host-selective toxin produced by *Stagonospora nodorum*. *Phytopathology*  
771 94:1056-1060.
- 772 Liu, Z., Faris, J.D., Oliver, R.P., Tan, K-C., Solomon, P.S., McDonald, M.C., McDonald, B.A.,  
773 Nunez, A., Lu, S., Rasmussen, J.B., and Friesen, T.L. (2009). *SnTox3* acts in effector  
774 triggered susceptibility to induce disease on wheat carrying the *Snn3* gene. *PLoS Pathog.*  
775 5:e1000581
- 776 Liu, Z., Zhang, Z., Faris, J.D., Oliver, R.P., Syme, R., McDonald, M.C., McDonald, B.A.,  
777 Solomon, P.S., Lu, S., Shelver, W.L., Xu, S., and Friesen, T.L. (2012). The cysteine rich  
778 necrotrophic effector *SnTox1* produced by *Stagonospora nodorum* triggers susceptibility  
779 of wheat lines harboring *Snn1*. *PLoS Pathog.* 8:e1002467
- 780 Liu, Z., and Friesen, T.L., (2012). Polyethylene glycol (PEG)-mediated transformation in  
781 filamentous fungal pathogens. In *Plant fungal pathogens* (pp. 365-375). Humana Press.
- 782 Liu, Z., Holmes, D.J., Faris, J.D., Chao, S., Brueggeman, R.S., Edwards, M.C., and Friesen, T.L.  
783 (2015). Necrotrophic effector-triggered susceptibility (NETS) underlies the barley-P  
784 yrenophora teres f. teres interaction specific to chromosome 6H. *Mol. Plant*  
785 *Pathol.* 16:188-200.
- 786 Liu, Z, Gao, Y., Kim, Y.M., Faris, J.D., Shelver, W.L., de Wit, P.J.G.M., Xu, S.S., and Friesen,  
787 T.L. (2016). *SnTox1*, a *Parastagonospora nodorum* necrotrophic effector, is a dual-  
788 function protein that facilitates infection while protecting from wheat-produced  
789 chitinases. *New Phytol.* 211:1052-1064.

- 790 Lo Presti, L., Lanver, D., Schweizer, G., Tanaka, S., Liang, L., Tollot, M., Zuccaro, A.,  
791 Reissmann, S., and Kahmann, R. (2015). Fungal effectors and plant susceptibility. *Annu.*  
792 *Rev. Plant Biol.* 66:513-545.
- 793 Lorang, J.M., Sweat, T.A., and Wolpert, T.J. (2007). Plant disease susceptibility conferred by a  
794 “resistance” gene. *Proc. Natl. Acad. Sci.* 104:14861-14866.
- 795 Lu, S., Faris, J.D., Sherwood, R., Friesen, T.L., and Edwards, M.C. (2014). A dimeric PR-1-type  
796 pathogenesis-related protein interacts with ToxA and potentially mediates ToxA-induced  
797 necrosis in sensitive wheat. *Mol. Plant Pathol.* 15:650-663.
- 798 McDonald, M.C., Ahren, D., Simpfendorfer, S., Milgate, A., and Solomon, P.S. (2018). The  
799 discovery of the virulence gene ToxA in the wheat and barley pathogen *Bipolaris*  
800 *sorokiniana*. *Mol. Plant Pathol.* 19: 432-439.
- 801 Meinhardt, S.W., Cheng, W., Kwon, C.Y., Donohue, C.M., and Rasmussen, J.B. (2002). Role of  
802 the Arginyl-Glycyl-Aspartic motif in the action of PtrToxA produced by *Pyrenophora*  
803 *tritici-repentis*. *Plant Physiol.* 130:1545–1551.
- 804 Nagy, E.D. and Bennetzen, J.L., (2008). Pathogen corruption and site-directed recombination at  
805 a plant disease resistance gene cluster. *Genome Res.* 18:1918-1923.
- 806 Nurk, S., Bankevich, A., Antipov, D., Gurevich, A., Korobeynikov, A., Lapidus, A., Prjibelsky,  
807 A., Pyshkin, A., Sirotkin, A., Sirotkin, Y. and Stepanauskas, R., (2013). Assembling  
808 genomes and mini-metagenomes from highly chimeric reads. In *Annual International*  
809 *Conference on Research in Computational Molecular Biology* (158-170). Springer,  
810 Berlin, Heidelberg.
- 811 Outram, M.A., Sung, Y.C., Yu, D., Dagvadorj, B., Rima, S., Jones, D., Ericsson, D.J.,  
812 Sperschneider, J., Solomon, P., Kobe, B. and Williams, S.J., (2020). The crystal structure  
813 of SnTox3 from the necrotrophic fungus *Parastagonospora nodorum* reveals a unique  
814 effector fold and insights into Kex2 protease processing of fungal effectors. *bioRxiv*.
- 815 Oliver, R.P., Friesen, T.L., Faris, J.D. and Solomon, P.S. (2012). *Stagonospora nodorum*: from  
816 pathology to genomics and host resistance. *Annu. Rev. Phytopathol.* 50:23-43.
- 817 Petersen, T.N., Brunak, S., Von Heijne, G., and Nielsen, H. (2011). SignalP 4.0: discriminating  
818 signal peptides from transmembrane regions. *Nat. Methods.* 8:785-786.
- 819 Quinlan, A.R., and Hall, I.M. (2010). BEDTools: a flexible suite of utilities for comparing  
820 genomic features. *Bioinformatics.* 26: 841-842.
- 821 Richards, J.K., Wyatt, N.A., Liu, Z., Faris, J.D. and Friesen, T.L., (2018). Reference quality  
822 genome assemblies of three *Parastagonospora nodorum* isolates differing in virulence on  
823 wheat. *G3: Genes, Genomes, Genetics,* 8:393-399.

- 824 Richards, J.K., Stukenbrock, E.H., Carpenter, J., Liu, Z., Cowger, C., Faris, J.D. and Friesen,  
825 T.L., (2019). Local adaptation drives the diversification of effectors in the fungal wheat  
826 pathogen *Parastagonospora nodorum* in the United States. PLoS Genet. 15: e1008223.
- 827 Shi, G., Friesen, T.L., Saini, J., Xu, S.S., Rasmussen, J.B., and Faris, J.D. (2015) The wheat *Snn7*  
828 gene confers susceptibility on recognition of the *Parastagonospora nodorum*  
829 necrotrophic effector SnTox7. Plant Genome-US 8: plantgenome2015-02.
- 830 Shi, G., Zhang, Z., Friesen, T.L., Raats, D., Fahima, T., Brueggeman, R.S., Lu, S., Trick, H.N.,  
831 Liu, Z., Chao, W., Frenkel, Z., Xu, S.S., Rasmussen, J.B., and Faris, J.D. (2016) The  
832 hijacking of a receptor kinase-driven pathway by a wheat fungal pathogen leads to  
833 disease. Sci. Adv. 2:e1600822.
- 834 Sperschneider, J., Gardiner, D.M., Dodds, P.N., Tini, F., Covarelli, L., Singh, K.B., Manners,  
835 J.M., and Taylor, J.M. (2016). EffectorP: predicting fungal effector proteins from  
836 secretomes using machine learning. New Phytol. 210:743-761.
- 837 Sung, Y.C., Outram, M.A., Breen, S., Wang, C., Dagvadorj, B., Winterberg, B., Kobe, B.,  
838 Williams, S.J. and Solomon, P.S., (2020). PR1-mediated defence via C-terminal  
839 peptide release is targeted by a fungal pathogen effector. New Phytolo.
- 840 Tang, Y., Liu, X., Wang, J., Li, M., Wang, Q., Tian, F., Su, Z., Pan, Y., Liu, D., Lipka, A.E. and  
841 Buckler, E.S., (2016). GAPIT version 2: an enhanced integrated tool for genomic  
842 association and prediction. Plant Genome. 9:1-9.
- 843 Williams, N.D., Miller, J.D., and Klindworth, D.L. (1992). Induced mutations of a genetic  
844 suppressor of resistance to wheat stem rust. Crop Sci. 32:612-616.
- 845 Zhang, Z., Friesen, T.L., Xu, S.S., Shi, G., Liu, Z., Rasmussen, J.B., and Faris J.D. (2011) Two  
846 putatively homoeologous wheat genes mediate recognition of SnTox3 to confer effector-  
847 triggered susceptibility to *Stagonospora nodorum*. Plant J. 65:27-38.
- 848 Zhong, Z., Marcel, T.C., Hartmann, F.E., Ma, X., Plissonneau, C., Zala, M., Ducasse, A.,  
849 Confais, J., Compain, J., Lapalu, N., and Amselem, J. (2017). A small secreted protein in  
850 *Zymoseptoria tritici* is responsible for avirulence on wheat cultivars carrying the *Stb6*  
851 resistance gene. New Phytol. 214:619-631.
- 852 Zhang, Z., Running, K.L.D., Seneviratne, S., Peters-Haugrud, A.R., Szabo-Hever, A., Shi,G.,  
853 Luo, M-C, Brueggeman, R., Xu, S.S. Friesen, T.L. and Faris, J.D. (2021). A protein  
854 kinase-major sperm protein gene hijacked by a necrotrophic fungal pathogen triggers  
855 disease susceptibility in wheat. Plant J. doi: 10.1111/tpj.15194.
- 856 Zhang, N., Yang, J., Fang, A., Wang, J., Li, D., Li, Y., Wang, S., Cui, F., Yu, J., Liu, Y. and  
857 Peng, Y.L., (2020). The essential effector SCRE1 in *Ustilaginoidea virens* suppresses rice  
858 immunity via a small peptide region. Mol. Plant Pathol. 21:445-459.

859

860

861 Table 1. Composite interval mapping (CIM) analysis of QTL associated with Sn2000 (wild  
 862 type), Sn2k-ect7 (isolate with an ectopic insertion of the hygromycin resistance gene, *cpc-*  
 863 *l:hyg<sup>R</sup>*), Sn2kΔTox5-10, Sn2kΔTox5-15 ( *SnTox5* disruption mutants of Sn2000) and  
 864 Sn79+Tox5-3 (Sn79-1087 transformed with SnTox5) for the inoculation of the LP749 double  
 865 haploid wheat population derived from the Lebsock (*Snn5*) × PI94749 (*snn5*) cross.

| Isolate      | LOD <sup>□</sup> |             | R <sup>2</sup> |             |
|--------------|------------------|-------------|----------------|-------------|
|              | <i>Snn5</i>      | <i>Tsn1</i> | <i>Snn5</i>    | <i>Tsn1</i> |
| Sn2000       | 10.31*           | 2.37        | 0.33           | 0.10        |
| Sn2k-ect7    | 9.65*            | 3.03*       | 0.32           | 0.11        |
| Sn2kΔTox5-10 | 0.21             | 7.82*       | 0.01           | 0.26        |
| Sn2kΔTox5-15 | 0.14             | 12.30*      | 0.01           | 0.36        |
| Sn79+Tox5-3  | 27.00*           | 0.15        | 0.66           | 0.01        |

866 <sup>□</sup>Permutation test with 1000 iterations resulted in a LOD threshold of 3.00 at *P*=0.05.

867 The “\*” represents significant QTL.

868

869

870

871 Table 2. Calculation of pN/pS ratios for the entire *SnTox5* gene and the region of the gene that  
 872 encodes for the mature protein in the Upper Midwest and South/East populations of *P. nodorum*.

|                                          | Upper Midwest (n=47) |                                             | South/East (n=47) |                                             |
|------------------------------------------|----------------------|---------------------------------------------|-------------------|---------------------------------------------|
|                                          | Entire gene          | Mature protein encoding region <sup>a</sup> | Entire gene       | Mature protein encoding region <sup>a</sup> |
| Synonymous SNPs                          | 2                    | 2                                           | 1                 | 1                                           |
| Synonymous Sites (average)               | 154.55               | 108.22                                      | 156.97            | 107.63                                      |
| Nonsynonymous SNPs                       | 6                    | 3                                           | 7                 | 6                                           |
| Nonsynonymous Sites (average)            | 487.45               | 341.78                                      | 494.03            | 342.37                                      |
| pN/pS (sites/average sites) <sup>b</sup> | 0.95                 | 0.47                                        | 2.22              | 1.89                                        |

873 <sup>a</sup>base pairs 201 to 654 of the *SnTox5* encodes for the mature protein. The sequence resulted from  
 874 the cleavage of signal peptide and pro-domain was considered for the calculation of pN/pS ratio.

875 <sup>b</sup> pN/pS ratios were calculated using the equation ,  $pN/pS = (\text{nonsynonymous SNPs}/$   
 876  $\text{nonsynonymous sites (average)})/(\text{synonymous SNP}/ \text{synonymous sites (average)})$ . pN/pS < 1  
 877 indicates that the *SnTox5* is undergoing purifying selection and pN/pS >1 indicates that the gene  
 878 is undergoing diversifying selection in the population.

879

880

881  
882 Table 3. Average disease reaction type of isolates producing the different isoforms of SnTox5 on  
883 LP29 with in the United States population of *P. nodorum*.

| Isoform    | Haplotype                                    | Number of isolates with the haplotype | Average disease reaction type $\square$ | Range of average disease reaction type |
|------------|----------------------------------------------|---------------------------------------|-----------------------------------------|----------------------------------------|
| Isoform 1  | Haplotype 1,10                               | 36                                    | 2.27a                                   | 0.50-4.33                              |
| Isoform 2  | Haplotype 2,12                               | 23                                    | 2.96b                                   | 2.17-3.67                              |
| Isoform 3  | Haplotype 3                                  | 16                                    | 3.36c                                   | 2.67-4.33                              |
| Isoform 4  | Haplotype 4                                  | 12                                    | 2.23a                                   | 1.17-3.25                              |
| Isoform 5  | Haplotype 5                                  | 7                                     | 3.07                                    | 1.50-4.33                              |
| Isoform 6  | Haplotype 6                                  | 6                                     | 2.63                                    | 1.67-3.83                              |
| Isoform 7  | Haplotype 7                                  | 4                                     | 2.71                                    | 2.33-3.00                              |
| Isoform 8  | Haplotype 8                                  | 3                                     | 3.50                                    | 3.33-3.67                              |
| Isoform 9  | Haplotype 9                                  | 3                                     | 2.72                                    | 1.83-3.17                              |
| Isoform 10 | Haplotype 11                                 | 1                                     | 2.50                                    | -                                      |
| Isoform 11 | Haplotype 13                                 | 1                                     | 2.50                                    | -                                      |
| Isoform 12 | Haplotype 14                                 | 1                                     | 3.17                                    | -                                      |
| Isoform 13 | Haplotype 15                                 | 1                                     | 2.17                                    | -                                      |
| Isoform 14 | Haplotype 16                                 | 1                                     | 2.17                                    | -                                      |
| Isoform 15 | Haplotype 17 <sup>α</sup>                    | 1                                     | 0.17                                    | -                                      |
| Isoform 16 | Haplotype 18 <sup>α</sup>                    | 1                                     | 1.17                                    | -                                      |
| Isoform 17 | Haplotype 19 <sup>α</sup>                    | 1                                     | 0.17                                    | -                                      |
| Isoform 18 | Haplotype 20 <sup>α</sup>                    | 1                                     | 0.50                                    | -                                      |
| Isoform 19 | Haplotype 21 <sup>α</sup>                    | 4                                     | 0.36                                    | 0.00-0.50                              |
| Isoform 20 | Haplotype 22 <sup>α</sup> , 28 <sup>αδ</sup> | 4                                     | 0.72                                    | 0.50-1.00                              |
| Isoform 21 | Haplotype 23 <sup>δ</sup>                    | 1                                     | 2.50                                    | -                                      |
| Isoform 22 | Haplotype 24 <sup>δ</sup>                    | 1                                     | 2.67                                    | -                                      |
| Isoform 23 | Haplotype 25 <sup>δ</sup>                    | 1                                     | 3.17                                    | -                                      |
| Isoform 24 | Haplotype 26 <sup>δ</sup>                    | 1                                     | 1.00                                    | -                                      |
| Isoform 25 | Haplotype 27 <sup>δ</sup>                    | 1                                     | 3.67                                    | -                                      |
| Isoform 26 | Haplotype 29 <sup>δ</sup>                    | 1                                     | 2.67                                    | -                                      |
| Isoform 27 | Haplotype 30 <sup>δ</sup>                    | 1                                     | 1.50                                    | -                                      |
| Isoform 28 | Haplotype 31 <sup>δ</sup>                    | 1                                     | 2.17                                    | -                                      |
| Isoform 29 | Haplotype 32 <sup>δ</sup>                    | 1                                     | 3.33                                    | -                                      |
| Isoform 30 | Haplotype 33 <sup>δ</sup>                    | 1                                     | 2.67                                    | -                                      |
| Isoform 31 | Haplotype 34 <sup>δ</sup>                    | 1                                     | 3.50                                    | -                                      |
| Isoform 32 | Haplotype 35 <sup>δ</sup>                    | 1                                     | 3.17                                    | -                                      |
| Isoform 33 | Haplotype 36 <sup>δ</sup>                    | 1                                     | 3.33                                    | -                                      |
| Isoform 34 | Haplotype 37 <sup>δ</sup>                    | 1                                     | 3.50                                    | -                                      |
| Isoform 35 | Haplotype 38 <sup>δ</sup>                    | 1                                     | 3.17                                    | -                                      |
| Isoform 36 | Haplotype 39 <sup>δ</sup>                    | 1                                     | 3.83                                    | -                                      |

884 <sup>α</sup>Haplotypes that contain a premature stop codon for *SnTox5*. <sup>δ</sup>Haplotypes with a sequence  
885 coverage between 50 to 100% for *SnTox5*,

886     Analysis of variance of average disease reaction was performed only for the isoforms  
887    represented by more than ten isolates. Least significant difference was calculated at the 0.05  
888    level of probability. Average disease reactions followed by same letter are not significantly  
889    different at the 0.05 level probability.



890 Table 4. Amino Acids substitutions at the 155<sup>th</sup> and 156<sup>th</sup> positions contribute to the variation in  
891 average disease reaction on LP29 caused by the *P. nodorum* isolates harboring active isoforms of  
892 SnTox5.

| Amino acid at the position |                   | Isoforms represented§ | Number of isolates with the substitution | Average disease reaction type□ |
|----------------------------|-------------------|-----------------------|------------------------------------------|--------------------------------|
| 155 <sup>th</sup>          | 156 <sup>th</sup> |                       |                                          |                                |
| T                          | N                 | 1, 4, 6, 11, 15       | 56                                       | 2.31a                          |
| R                          | S                 | 2, 10, 12             | 26                                       | 2.95b                          |
| K                          | S                 | 5,13                  | 8                                        | 2.95b                          |
| K                          | N                 | 3,7,8,9               | 26                                       | 3.20b                          |

893 § Isolates from these isoforms that represent identical substitutions were pooled together for the  
894 mean comparison of average disease reaction.

895 □ Least significant difference (LSD) was calculated at  $P < 0.05$  probability. Numbers followed by  
896 the same letter were not significantly different at the 0.05 level of probability.

897

898

899

900

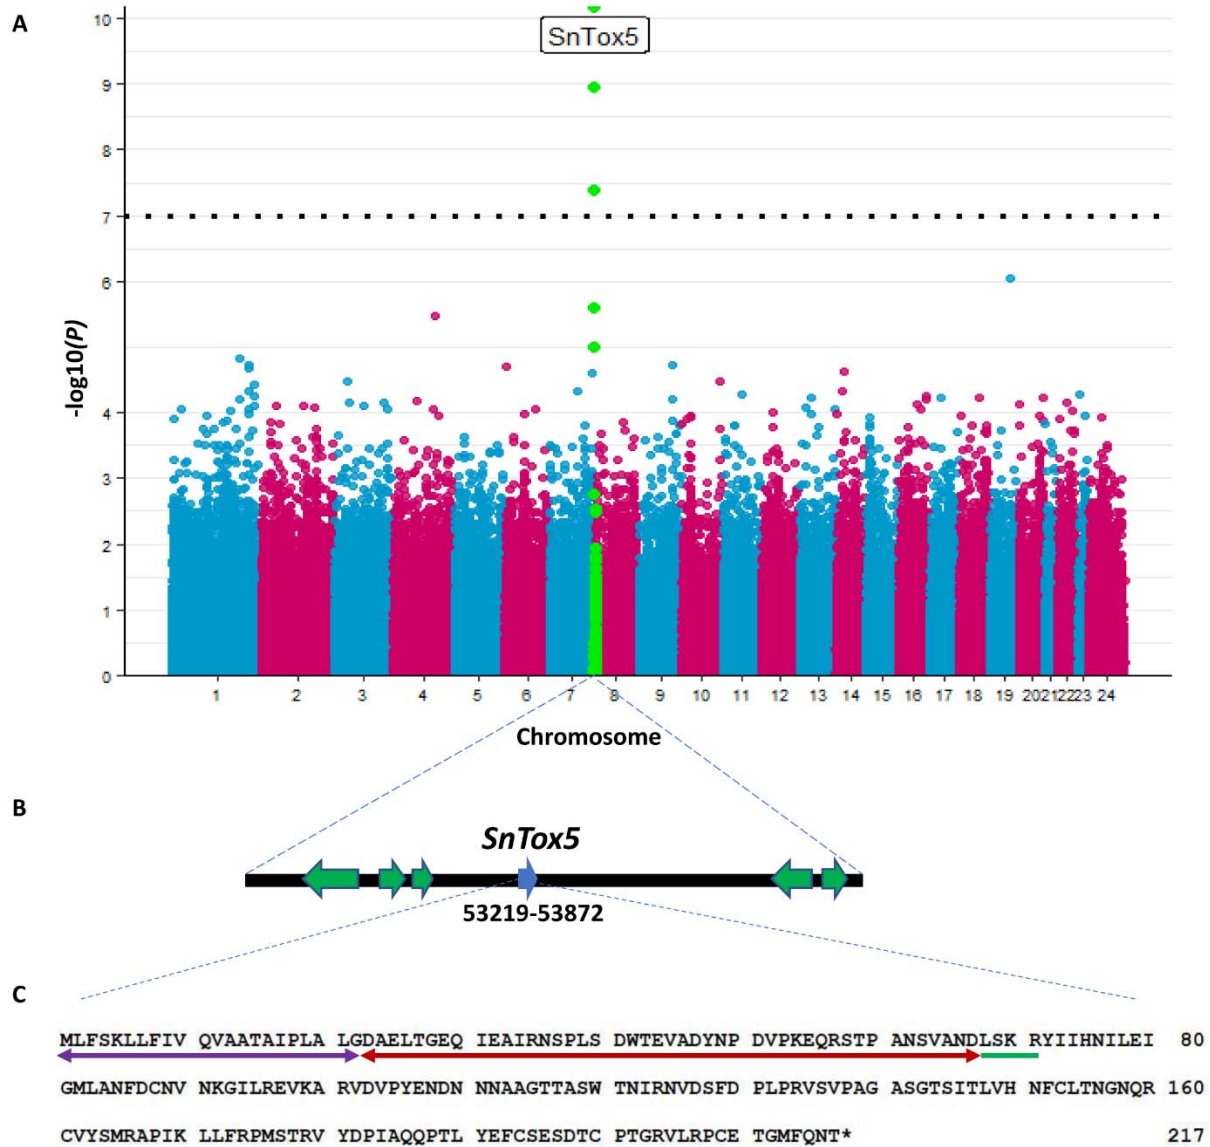

901

902

903 **Figure 1. Genome-wide association mapping (GWAS) analysis of *SnTox5*.** **A)** Manhattan plot  
 904 of the GWAS performed using the phenotypic data from each isolates of the United States  
 905 *Parastagonospora nodorum* population on differential line LP29. The x-axis labels denote  
 906 chromosome numbers of the *P. nodorum* genome and the y-axis represents the  $-\log_{10}$   
 907 transformation of the  $P$ -value for significance of the marker trait association. The horizontal  
 908 dotted line represents the Bonferroni significance threshold at the 0.05 level of probability. **B)**  
 909 The genomic location of *SnTox5* using the Sn2000 genome sequence as a reference. **C).** Amino  
 910 acid sequence of SnTox5 from Sn2000. Purple and red double headed arrows represent the

911 predicted signal peptide and the pro-sequence, respectively. The green line represents the  
912 putative Kex2 protease site and the “\*” represents the stop codon.

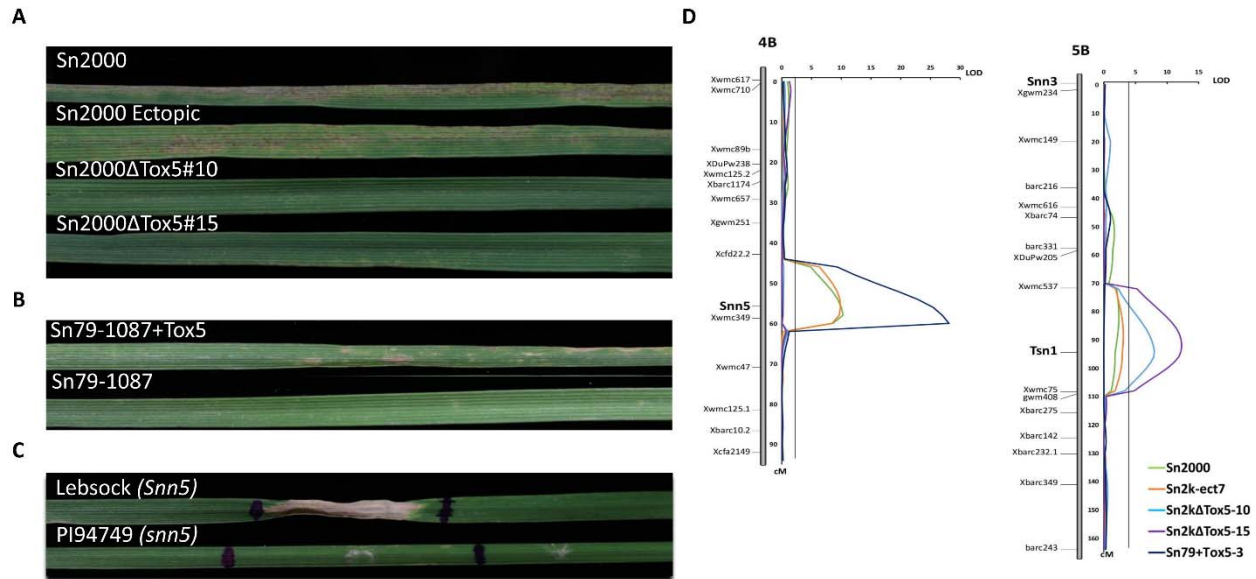

913

914 **Figure 2. Phenotypic and QTL analysis validation of *SnTox5*.** **A)** Phenotype of LP29 (*Snn5*)  
 915 inoculated with Sn2000, Sn2k-ect7, and Sn2000 *SnTox5* gene-disruption mutants Sn2kΔTox5-10  
 916 and Sn2kΔTox5-15. **B)** Phenotype of LP29(*Snn5*) inoculated with the avirulent isolate Sn79-  
 917 1087 (bottom) and the gain-of-function transformant Sn79+Tox5-3 (top). **C).** Infiltration of  
 918 culture filtrate of Sn79+Tox5-3 on the parental lines of the LP749 population including Lebsock  
 919 (top) and PI94749 (bottom). **D)** QTL analysis on the LP749 population using strains Sn2000,  
 920 Sn2k-ect7, Sn2kΔTox5-10, Sn2kΔTox5-15, and Sn79+Tox5-3, illustrating the significance of  
 921 *Tsn1* and *Snn5* in the presence and absence of the *SnTox5-Snn5* interaction.

922

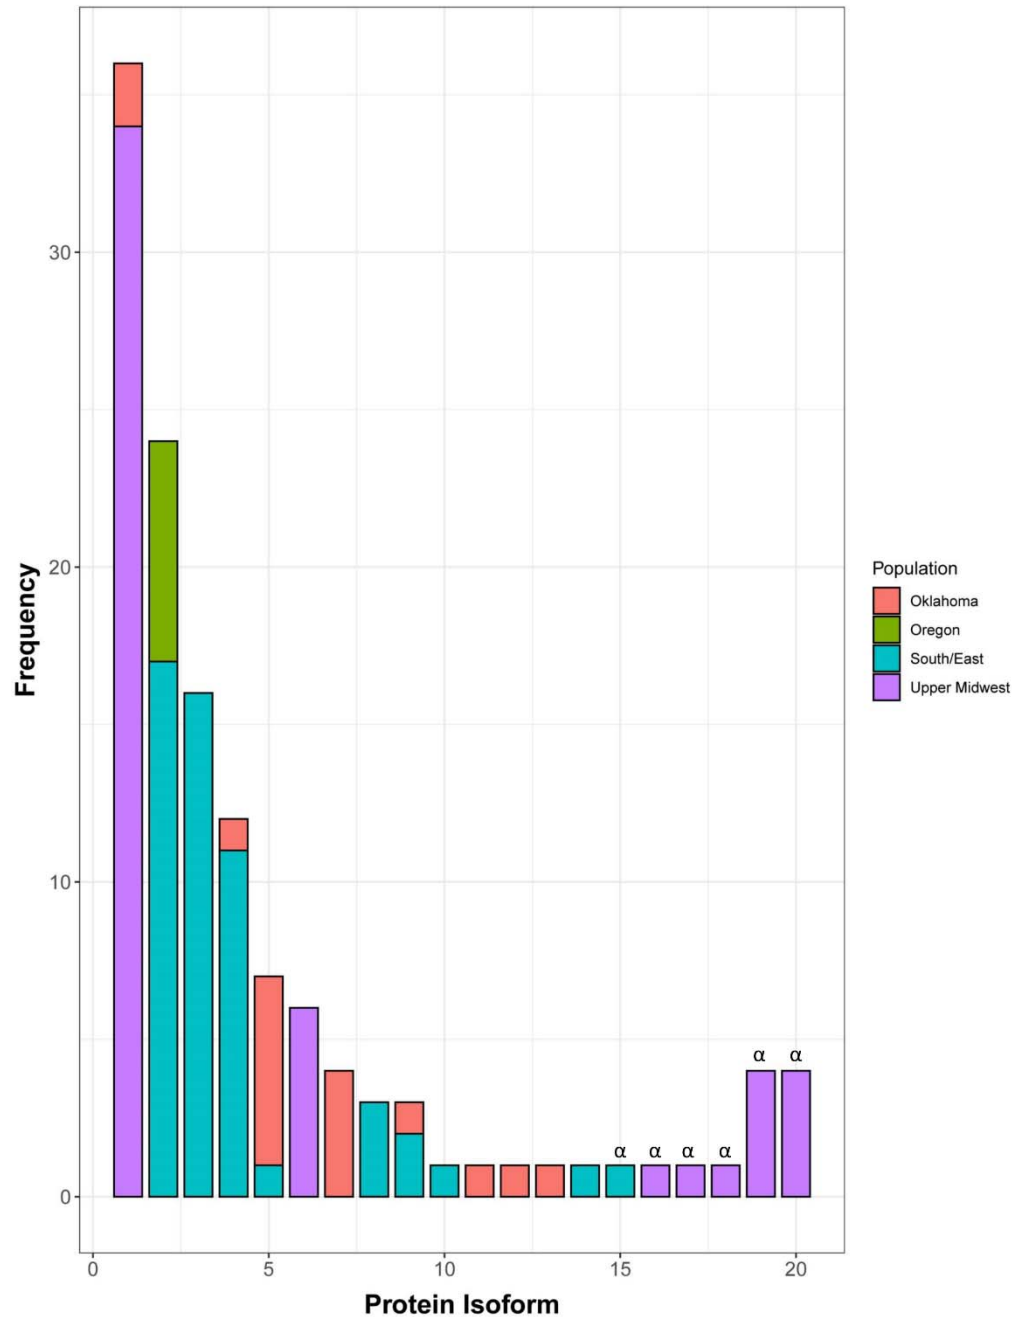

923

924 **Figure 3. Prevalence of isoforms of SnTox5 in Upper Midwest, South/East, Oregon and**  
925 **Oklahoma population of *P. nodorum*.** Distribution of isoforms of SnTox5 in different *P.*  
926 *nodorum* populations from four regions of the United States showed that each population  
927 consisted of multiple isoforms of SnTox5, except the Oregon population, with varying degree of  
928 prevalence. SnTox5 isoform1 was the most prevalent isoform of the Upper Midwest population  
929 whereas isoform 5 was the most prevalent in the Oklahoma population. Isoform 2 was the most  
930 prevalent in both the Oregon and South/East populations. Isoforms marked with 'α' represent an  
931 inactive form of SnTox5 with a premature stop codon.



945

946

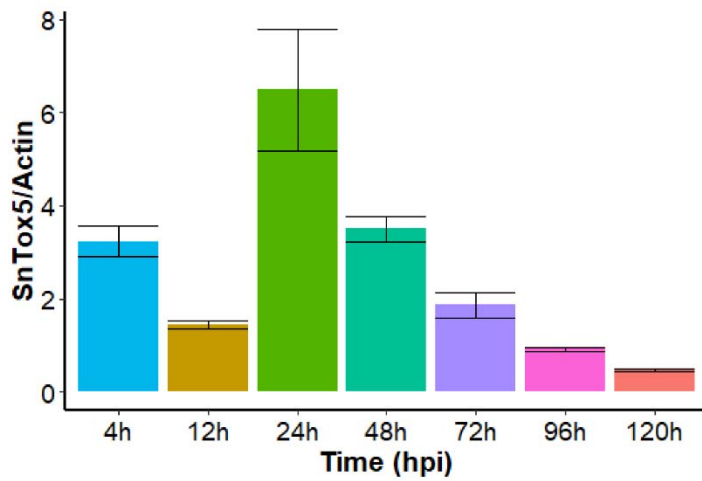

947

948 **Figure 5. Temporal expression pattern of *SnTox5* in planta, on Lebsock inoculated with**  
949 ***Sn2000*.** The x-axis shows the sample collection time points for qPCR and the y-axis represents  
950 the expression of *SnTox5* relative to the expression of the *actin* gene. Error bars represent the  
951 standard error of the mean from three replications for each time point.

952

953

954

955

956

957

958

959



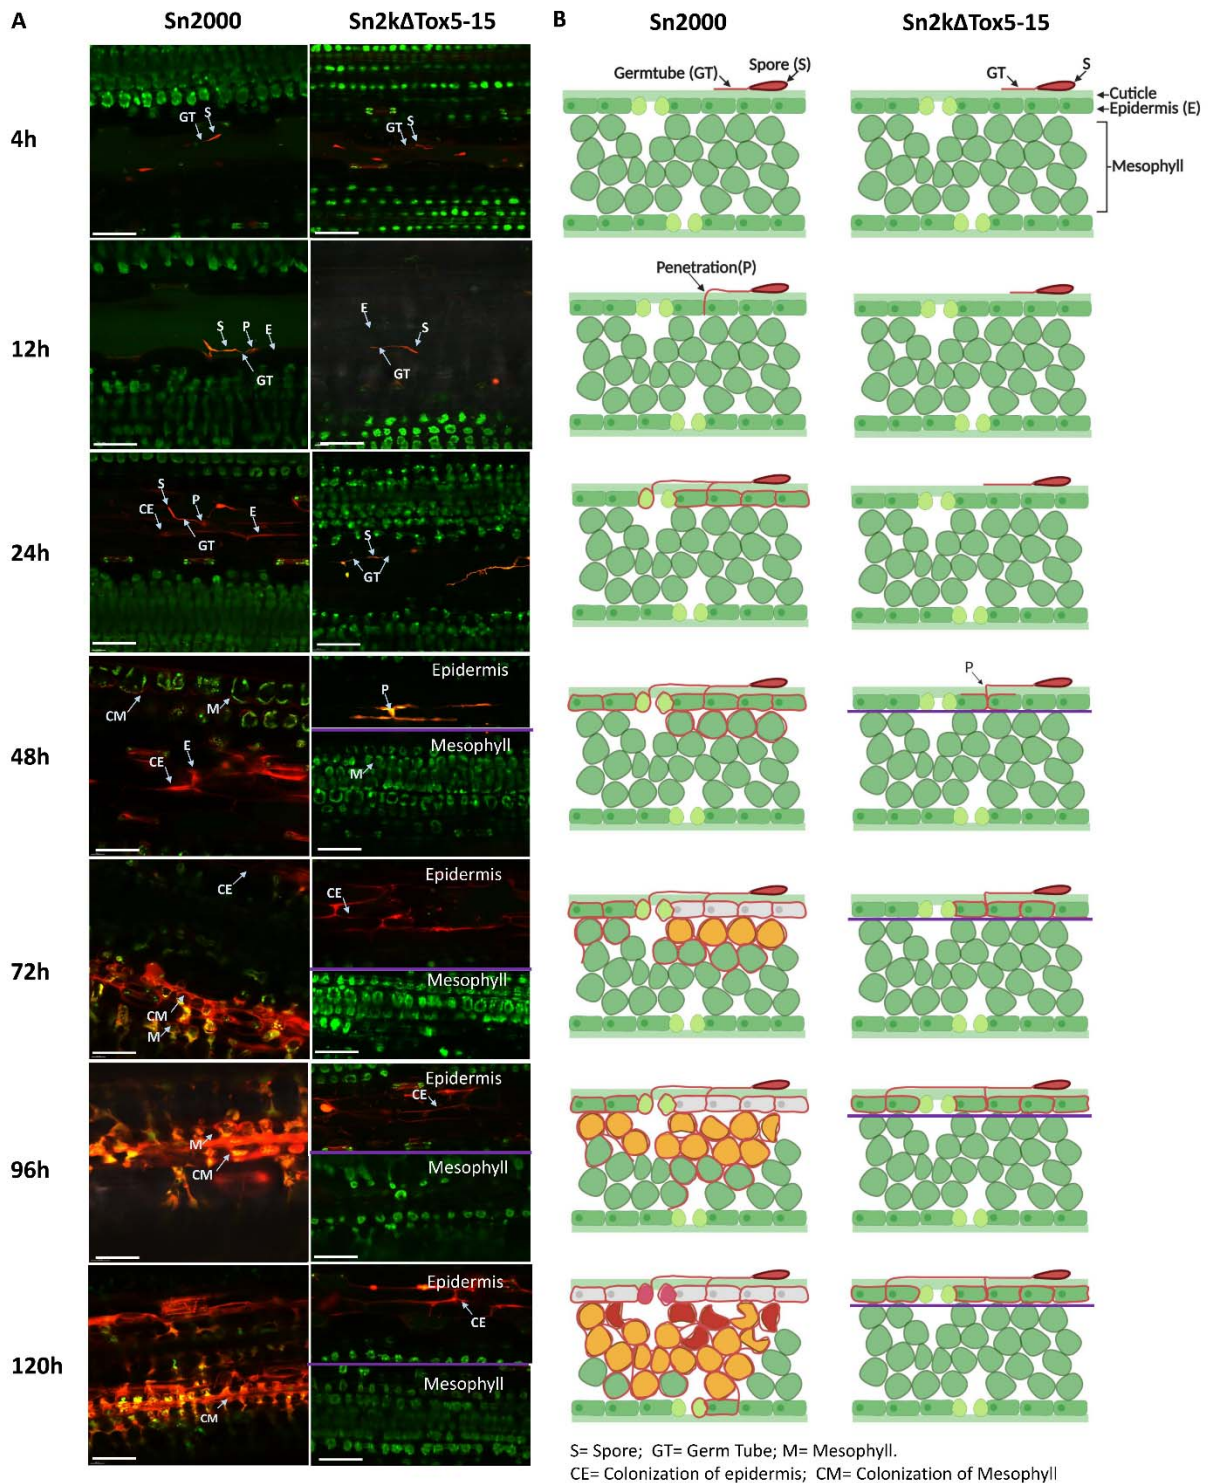

960

961 **Figure 6. Laser confocal microscopy of the infection process of red fluorescent protein**  
 962 **(RFP) tagged *P. nodorum* strains Sn2000 and Sn2kΔTox5-15 on wheat differential line**  
 963 **LP29 (*Snn5*).** (A) Micrographs of wheat leaves obtained through confocal imaging at 4, 12, 24,  
 964 48, 72, 96, and 120 hours post inoculation (hpi) of Sn2000 and Sn2kΔTox5-15. Fungal spores



965 and hyphae are displayed in red. Wheat cells are displayed in various colors depending on the  
966 autofluorescence emitted by the degrading chloroplast, where green color indicates healthy cells  
967 and yellow to red color indicates cells that are undergoing programmed cell death. Separate z-  
968 stack micrographs taken at the epidermis and the mesophyll tissue at 48 to 120 hpi timepoints  
969 showed that Sn2kΔTox5-15 failed to advance into the mesophyll tissue. (B) Schematic drawings  
970 of transverse sections of each micrograph of (A). Purple line separates the epidermis from the  
971 mesophyll tissue. Scale bar = 60 μm.

972

973

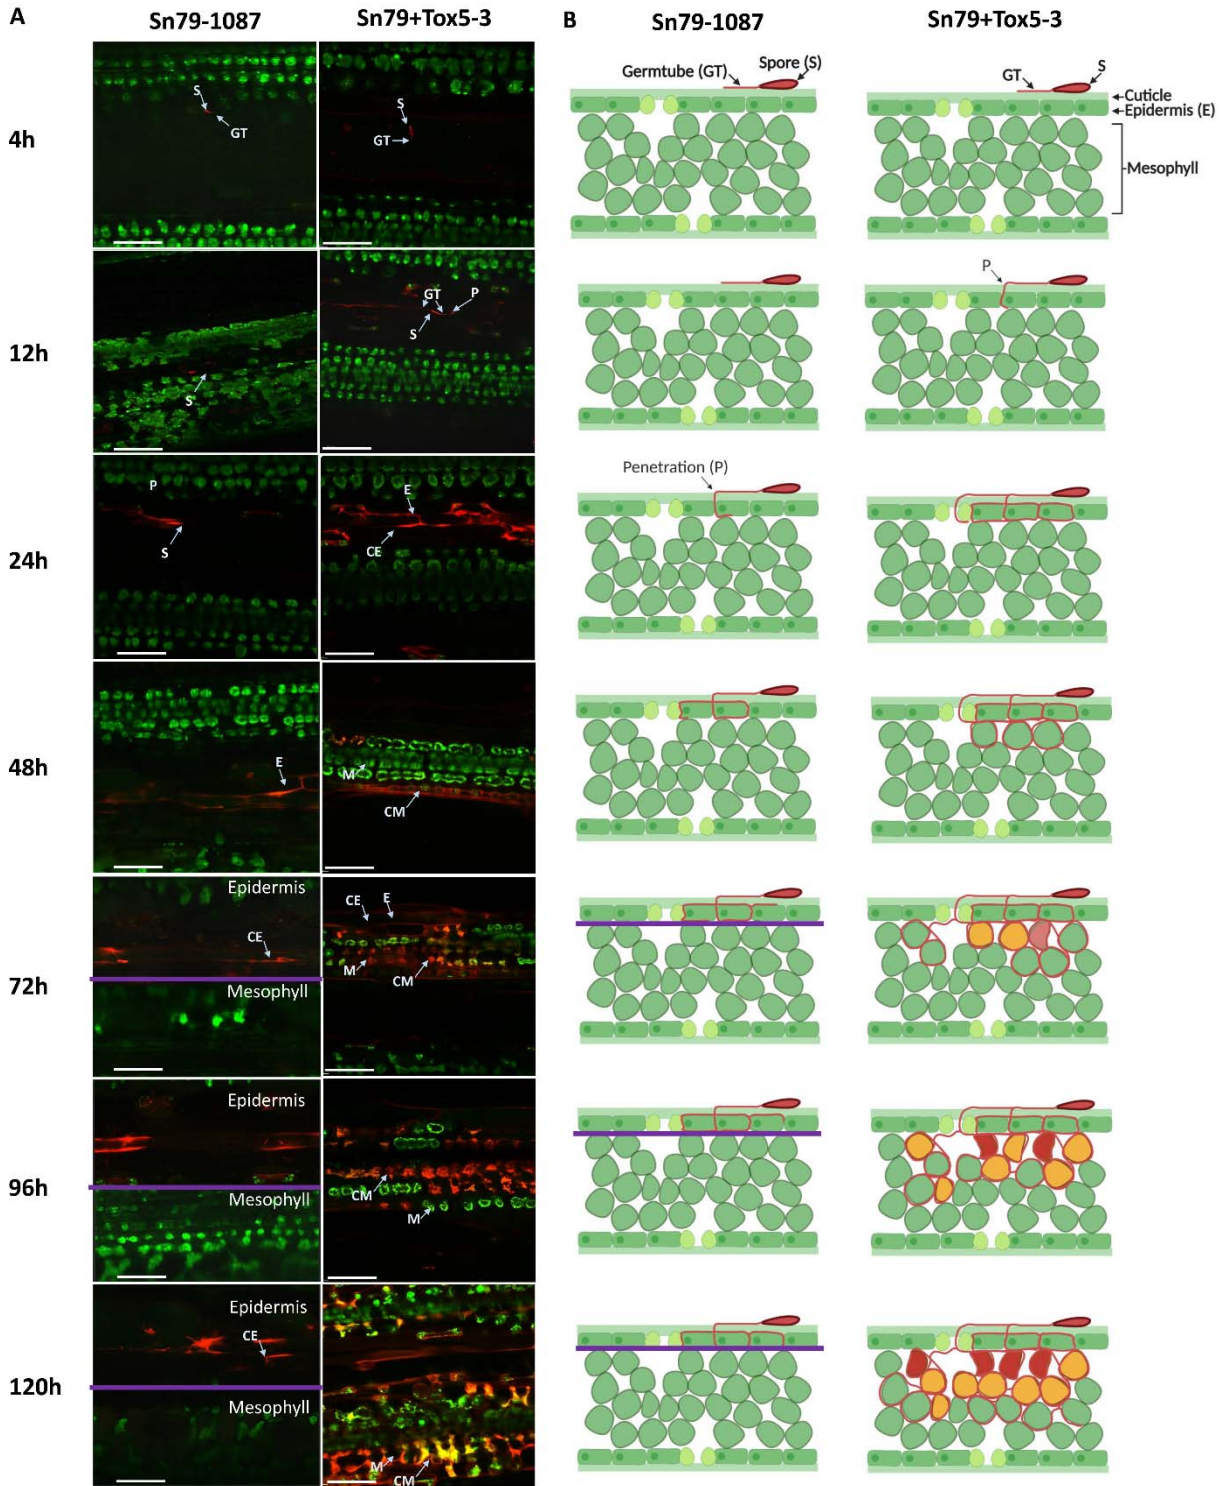

974

975

976 **Figure 7. Laser confocal microscopy of the infection process of red fluorescent protein**  
977 **(RFP) labeled *P. nodorum* strains Sn79-1087 (avirulent) and Sn79+Tox5-3 on wheat**  
978 **differential line LP29 (*Snn5*).** (A) Micrographs of wheat leaves obtained through confocal  
979 imaging at 4, 12, 24, 48, 72, 96, and 120 hours post inoculation (hpi) of Sn79-1087 and  
980 Sn79+Tox5-3. Fungal spores and hyphae are displayed in red. Wheat cells are displayed in  
981 various colors depending on the auto fluorescence emitted by the degrading chloroplast, where  
982 green color indicates healthy cells and yellow to red color indicates cells that undergoing  
983 program cell death. Separate z-stack micrographs taken at the epidermis and the mesophyll  
984 tissue at 72 hpi to 120 hpi timepoints showed that Sn79-1087 failed to reach the mesophyll tissue  
985 as *SnTox5* mutant of Sn2000. Transfer of *SnTox5* to Sn79-1087 enables the fungus to reach the  
986 mesophyll tissue. (B) Schematic drawings of transverse sections of each micrograph of (A).  
987 Purple line separates the epidermis from the mesophyll tissue. Scale bar = 60  $\mu$ m.  
988

989

990

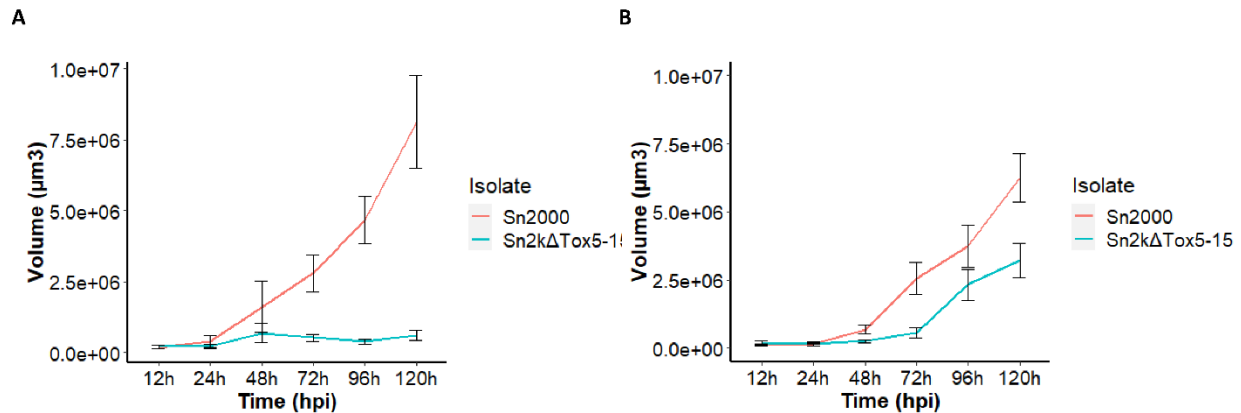

991

992 **Figure 8. Volume of the fungus calculated through laser confocal microscopy on A). LP29**  
993 **(*Snn5*) and B). Lebsock (*Snn5* and *Tsn1*) for the strains Sn2000 (+*SnTox5*, +*SnToxA*) and**  
994 **Sn2k $\Delta$ *Tox5*(- *SnTox5*, +*SnToxA*) at various time points post inoculation. The x-axis**  
995 **represents hours post inoculation (hpi) and the y-axis represents the volume of the fungus in**  
996  **$\mu\text{m}^3$ . The volume of Sn2000 increased linearly after 24 hpi on both wheat lines. The increase in**  
997 **volume of Sn2k $\Delta$ *Tox5* on LP29 was negligible during the experiment. However, linear increase**  
998 **in volume of Sn2k $\Delta$ *Tox5* was observed after 72 hpi on Lebsock due to the establishment of**  
999 ***SnToxA-Tsn1* interaction.**

1000

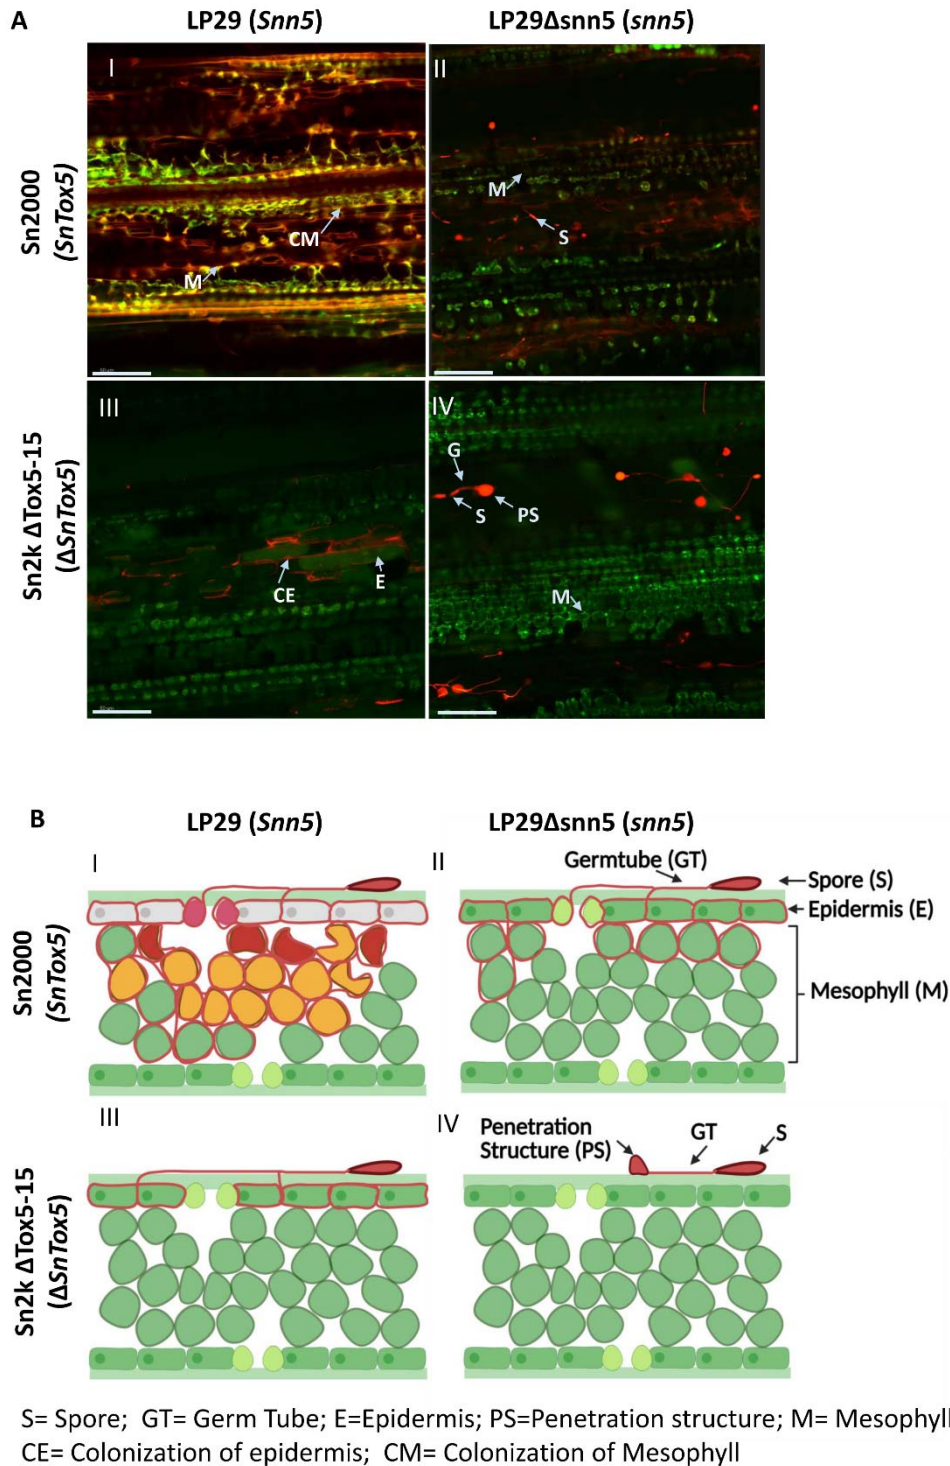

1001

1002 Figure 9. **Laser confocal microscopy of red fluorescent protein (RFP) tagged Sn2000 and**  
 1003 **Sn2k $\Delta$ Tox5-15 inoculated on LP29 and LP29 $\Delta$ *snn5* at 120 hpi (A). Micrographs of RFP**  
 1004 **tagged Sn2000 (+*SnTox5*) and Sn2k $\Delta$ Tox5 (-*SnTox5*) inoculated on LP29 (*Snn5*), and**

1005 LP29 $\Delta$ snn5 (*snn5*) at 120 hpi. (B) Schematic drawings of transverse sections of each micrograph  
1006 of (A). A(I) and B(I). Sn2000 induced programmed cell death (PCD) and colonized the  
1007 mesophyll tissue of LP29. A(II) and B(II). Sn2000 was able to colonize the epidermis and  
1008 hyphae were advanced into the mesophyll tissue but failed to induce PCD on LP29 $\Delta$ snn5 due to  
1009 the lack of functional *Snn5*. A(III) and B(III). Sn2k $\Delta$ Tox5 colonized the epidermal tissue but  
1010 failed to progress to the mesophyll tissue since it lacked *SnTox5*. A(IV) and B(IV). Sn2k $\Delta$ Tox5  
1011 formed a penetration structure on LP29 $\Delta$ snn5. However, Sn2k $\Delta$ Tox5 was not able to penetrate  
1012 the epidermis since Sn2000 $\Delta$ Tox5 and LP29 $\Delta$ snn5 lacked *SnTox5* and *Snn5*. Therefore, these  
1013 results showed establishment of *SnTox5-Snn5* is essential for the *P. nodorum* to colonize the  
1014 mesophyll of LP29 and lack of either partner of the interaction cause a deleterious effect of  
1015 fungal growth. Scale bar = 100  $\mu$ m.

1016



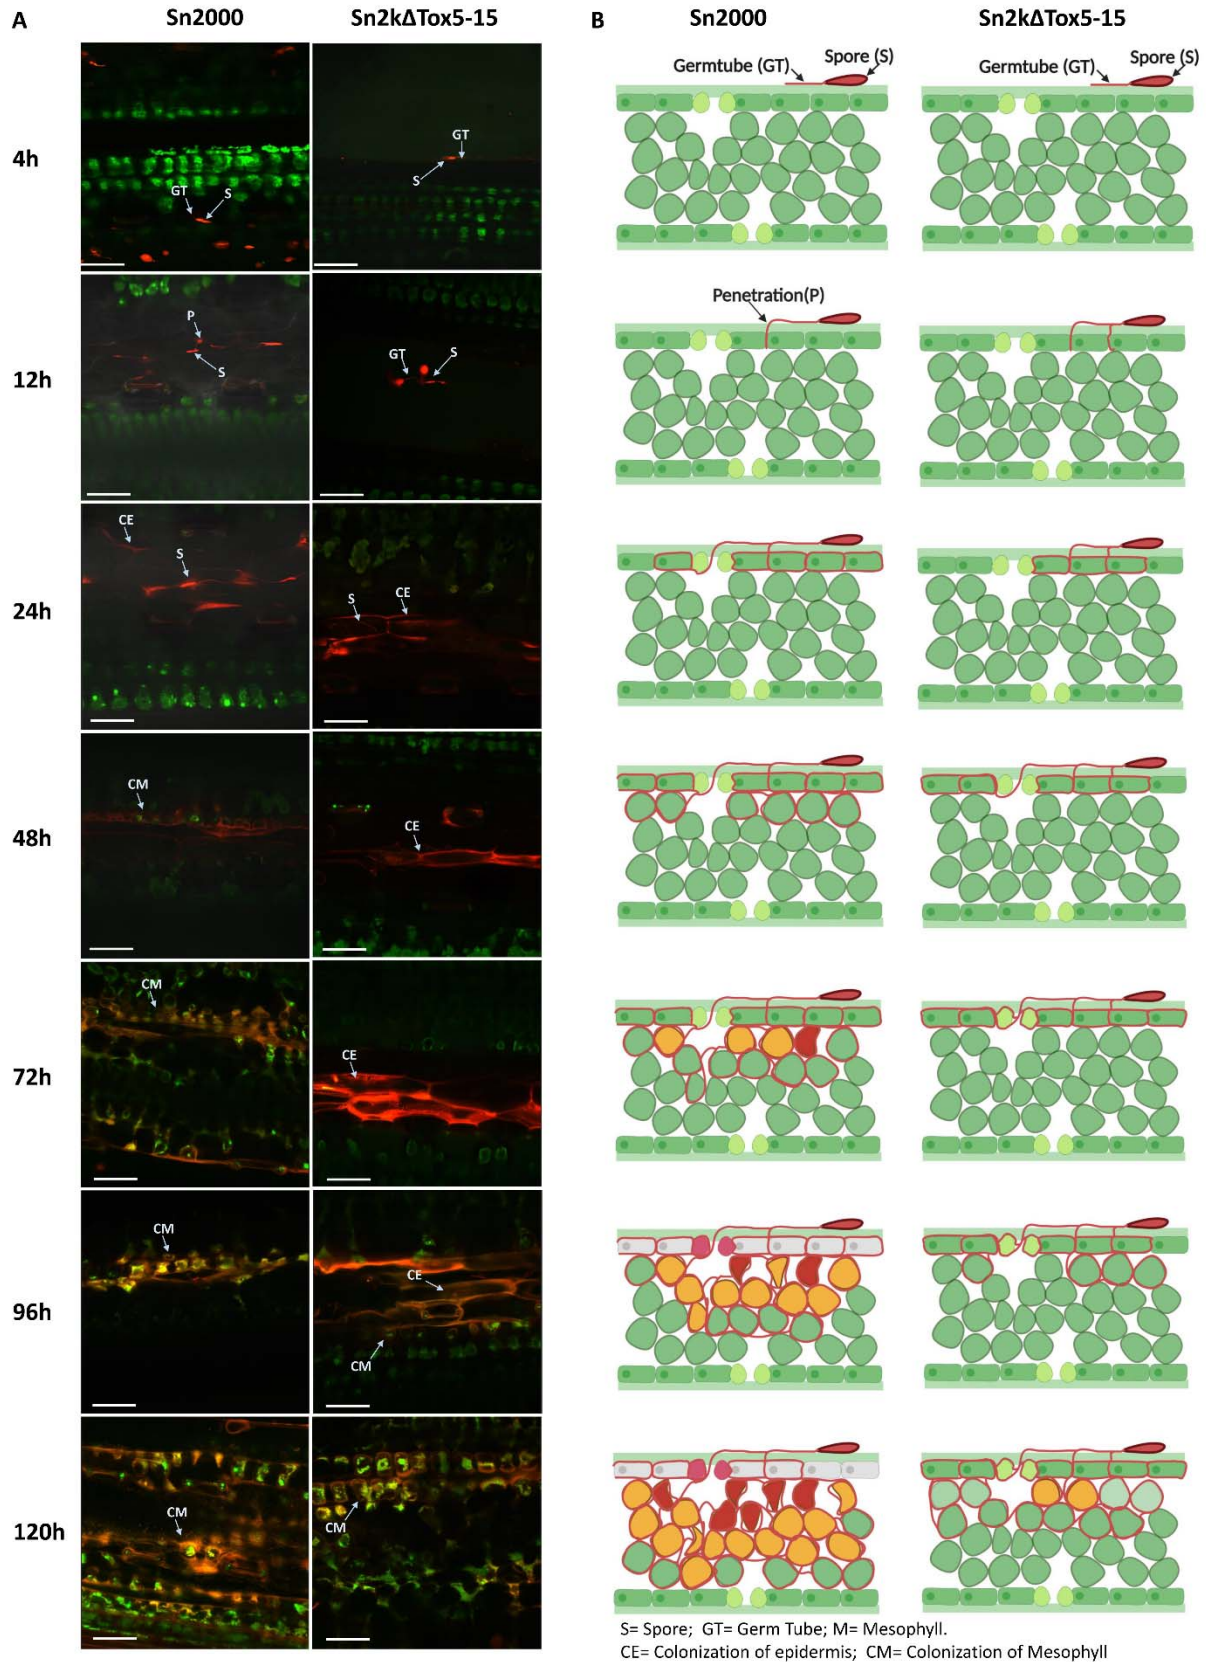

1018 **Figure 10. Laser confocal microscopy of the infection process of red fluorescent protein**  
1019 **(RFP) labeled *P. nodorum* strains Sn2000 and Sn2kΔTox5-15 on wheat cultivar Lebsock**  
1020 **(*Snn5* and *Tsn1*).** (A) Micrographs of wheat leaves obtained through laser confocal imaging at  
1021 4, 12, 24, 48, 72, 96, and 120 hpi of Sn2000 and Sn2kΔTox5. Fungal spores and hyphae are  
1022 displayed in red. Wheat cells are displayed in various colors depending on the autofluorescence  
1023 emitted by the degrading chloroplast, where green color indicates healthy cells and yellow to red  
1024 color indicates cells that are undergoing programmed cell death. (B) Schematic drawings of  
1025 transverse sections of each micrograph of (A) clearly illustrate that Sn2000 was able to advance  
1026 into the mesophyll tissue and colonize the mesophyll tissue rapidly compared to the that of  
1027 Sn2kΔTox5-15. Scale bar = 60 μm.

1028
